# Supplementary material for: Long Non-coding RNA SNHG12 Functions as a Competing Endogenous RNA to Regulate MDM4 Expression by Sponging miR-129-5p in Clear Cell Renal Cell Carcinoma
Source: PubMed Central journal article supplement (PMC6882951; doi:10.3389/fonc.2019.01260), 2019-11-22
Supplement: Data_Sheet_1.pdf [file Data_Sheet_1.pdf]

## Pearson correlation analysis between SNHG12 and 1,350 potential target genes

| LncRNA | target gene | cor   | pvalue   |
|--------|-------------|-------|----------|
| SNHG12 | CLEC2D      | 0.683 | 3.49E-85 |
| SNHG12 | WSB1        | 0.681 | 1.37E-84 |
| SNHG12 | RSRP1       | 0.667 | 4.92E-80 |
| SNHG12 | RBM33       | 0.652 | 3.38E-75 |
| SNHG12 | EIF4A1      | 0.638 | 3.58E-71 |
| SNHG12 | DONSON      | 0.629 | 1.06E-68 |
| SNHG12 | GIGYF1      | 0.629 | 1.47E-68 |
| SNHG12 | TIA1        | 0.611 | 7.52E-64 |
| SNHG12 | ADAT2       | 0.598 | 1.97E-60 |
| SNHG12 | MDM4        | 0.585 | 2.70E-57 |
| SNHG12 | NKTR        | 0.567 | 3.70E-53 |
| SNHG12 | NABP1       | 0.561 | 6.46E-52 |
| SNHG12 | AL365205.   | 0.557 | 4.16E-51 |
| SNHG12 | CSNK1E      | 0.557 | 4.85E-51 |
| SNHG12 | ATG12       | 0.551 | 1.05E-49 |
| SNHG12 | SRSF11      | 0.534 | 2.47E-46 |
| SNHG12 | RALGDS      | 0.533 | 4.42E-46 |
| SNHG12 | YBX3        | 0.526 | 9.16E-45 |
| SNHG12 | PHF21A      | 0.525 | 1.62E-44 |
| SNHG12 | CCNL1       | 0.52  | 1.30E-43 |
| SNHG12 | PNISR       | 0.518 | 2.43E-43 |
| SNHG12 | UPF3B       | 0.512 | 4.49E-42 |
| SNHG12 | PLEKHO1     | 0.498 | 1.32E-39 |
| SNHG12 | ZRANB2      | 0.492 | 1.73E-38 |
| SNHG12 | SKP2        | 0.492 | 1.61E-38 |
| SNHG12 | NAGK        | 0.491 | 1.87E-38 |
| SNHG12 | CREBZF      | 0.483 | 4.57E-37 |
| SNHG12 | PLCG1       | 0.479 | 2.60E-36 |
| SNHG12 | CCNF        | 0.46  | 2.15E-33 |
| SNHG12 | ZNF706      | 0.456 | 1.00E-32 |
| SNHG12 | BAZ1A       | 0.45  | 7.52E-32 |
| SNHG12 | TRIP13      | 0.447 | 2.78E-31 |
| SNHG12 | ITGAE       | 0.445 | 5.51E-31 |
| SNHG12 | TNRC6A      | 0.443 | 8.15E-31 |
| SNHG12 | ETV6        | 0.429 | 1.02E-28 |
| SNHG12 | DLGAP4      | 0.426 | 2.34E-28 |
| SNHG12 | ZNF587      | 0.421 | 1.08E-27 |
| SNHG12 | ZNF395      | 0.421 | 1.23E-27 |
| SNHG12 | MED26       | 0.42  | 1.67E-27 |
| SNHG12 | MTF2        | 0.411 | 3.05E-26 |
| SNHG12 | GOLGA3      | 0.411 | 3.06E-26 |
| SNHG12 | CBLB        | 0.411 | 2.44E-26 |
| SNHG12 | CNTRL       | 0.41  | 3.61E-26 |
| SNHG12 | HNRNPA1     | 0.41  | 3.46E-26 |
| SNHG12 | RGS17       | 0.409 | 5.22E-26 |
| SNHG12 | FBXW7       | 0.408 | 7.42E-26 |
| SNHG12 | RUNX1       | 0.406 | 1.25E-25 |
| SNHG12 | AP3S1       | 0.403 | 3.20E-25 |
| SNHG12 | DNMT3A      | 0.402 | 4.03E-25 |
| SNHG12 | TRIO        | 0.4   | 7.26E-25 |
| SNHG12 | PRR11       | 0.399 | 1.08E-24 |
| SNHG12 | POGZ        | 0.397 | 1.72E-24 |
| SNHG12 | RNF217      | 0.394 | 4.12E-24 |
| SNHG12 | U2AF1       | 0.393 | 5.83E-24 |
| SNHG12 | CELSR3      | 0.393 | 5.63E-24 |
| SNHG12 | RBM25       | 0.392 | 7.74E-24 |
| SNHG12 | ANKRD49     | 0.39  | 1.19E-23 |

|        |           |       |          |
|--------|-----------|-------|----------|
| SNHG12 | LRIG2     | 0.39  | 1.30E-23 |
| SNHG12 | KIF20A    | 0.389 | 1.82E-23 |
| SNHG12 | SENP3-EIF | 0.386 | 3.49E-23 |
| SNHG12 | AL096711. | 0.386 | 4.14E-23 |
| SNHG12 | U2SURP    | 0.384 | 6.24E-23 |
| SNHG12 | BCL11B    | 0.381 | 1.47E-22 |
| SNHG12 | PBX2      | 0.376 | 5.47E-22 |
| SNHG12 | GIT1      | 0.374 | 1.07E-21 |
| SNHG12 | TIAL1     | 0.373 | 1.36E-21 |
| SNHG12 | NMI       | 0.371 | 2.14E-21 |
| SNHG12 | ORC2      | 0.367 | 7.11E-21 |
| SNHG12 | SCMH1     | 0.367 | 6.46E-21 |
| SNHG12 | ENOSF1    | 0.366 | 9.26E-21 |
| SNHG12 | PABPC1    | 0.366 | 9.10E-21 |
| SNHG12 | SAMD10    | 0.366 | 8.92E-21 |
| SNHG12 | CPSF7     | 0.364 | 1.38E-20 |
| SNHG12 | ZNF532    | 0.36  | 3.90E-20 |
| SNHG12 | SLAMF7    | 0.357 | 7.84E-20 |
| SNHG12 | RBM26     | 0.356 | 1.13E-19 |
| SNHG12 | E2F7      | 0.356 | 1.19E-19 |
| SNHG12 | GATAD1    | 0.356 | 1.18E-19 |
| SNHG12 | BRCA2     | 0.354 | 1.68E-19 |
| SNHG12 | HOXA3     | 0.351 | 3.65E-19 |
| SNHG12 | MATR3     | 0.348 | 8.24E-19 |
| SNHG12 | PHF12     | 0.347 | 9.82E-19 |
| SNHG12 | USF2      | 0.346 | 1.13E-18 |
| SNHG12 | PPP1R3B   | 0.343 | 2.59E-18 |
| SNHG12 | UBN2      | 0.341 | 4.71E-18 |
| SNHG12 | CREB5     | 0.339 | 6.31E-18 |
| SNHG12 | HELLS     | 0.337 | 1.15E-17 |
| SNHG12 | RASSF5    | 0.335 | 1.57E-17 |
| SNHG12 | SLC39A14  | 0.334 | 2.39E-17 |
| SNHG12 | ZDHHC17   | 0.334 | 1.98E-17 |
| SNHG12 | PRDM1     | 0.333 | 2.74E-17 |
| SNHG12 | IRF1      | 0.328 | 9.00E-17 |
| SNHG12 | RNF213    | 0.326 | 1.46E-16 |
| SNHG12 | TP53INP1  | 0.325 | 1.63E-16 |
| SNHG12 | PDCD6     | 0.324 | 1.90E-16 |
| SNHG12 | TYMS      | 0.324 | 1.92E-16 |
| SNHG12 | BICD1     | 0.323 | 2.51E-16 |
| SNHG12 | KIF18A    | 0.323 | 2.70E-16 |
| SNHG12 | METTL23   | 0.322 | 3.35E-16 |
| SNHG12 | TGM2      | 0.32  | 4.97E-16 |
| SNHG12 | IRF4      | 0.316 | 1.24E-15 |
| SNHG12 | CNEP1R1   | 0.315 | 1.51E-15 |
| SNHG12 | GAN       | 0.314 | 1.80E-15 |
| SNHG12 | P4HA2     | 0.312 | 2.82E-15 |
| SNHG12 | ARL6IP6   | 0.311 | 3.96E-15 |
| SNHG12 | ZMYND8    | 0.311 | 3.35E-15 |
| SNHG12 | U2AF1L5   | 0.309 | 5.60E-15 |
| SNHG12 | HERC4     | 0.307 | 8.31E-15 |
| SNHG12 | RBM41     | 0.307 | 9.21E-15 |
| SNHG12 | KDM2B     | 0.305 | 1.19E-14 |
| SNHG12 | CCDC88A   | 0.301 | 2.97E-14 |
| SNHG12 | AGO3      | 0.301 | 3.00E-14 |
| SNHG12 | CCAR1     | 0.3   | 3.76E-14 |
| SNHG12 | ATAD2B    | 0.3   | 3.65E-14 |
| SNHG12 | QSOX2     | 0.298 | 4.88E-14 |

|        |          |       |          |
|--------|----------|-------|----------|
| SNHG12 | ZNF385A  | 0.298 | 5.60E-14 |
| SNHG12 | PMP22    | 0.297 | 6.89E-14 |
| SNHG12 | SRSF7    | 0.296 | 7.58E-14 |
| SNHG12 | MAML1    | 0.295 | 1.05E-13 |
| SNHG12 | PON2     | 0.295 | 9.79E-14 |
| SNHG12 | BASP1    | 0.291 | 2.01E-13 |
| SNHG12 | RBM3     | 0.289 | 3.52E-13 |
| SNHG12 | ARPC5    | 0.285 | 7.52E-13 |
| SNHG12 | ZNF280C  | 0.285 | 6.76E-13 |
| SNHG12 | RAD23A   | 0.284 | 8.05E-13 |
| SNHG12 | KCTD3    | 0.284 | 8.61E-13 |
| SNHG12 | KIAA0408 | 0.281 | 1.63E-12 |
| SNHG12 | SPATS2   | 0.28  | 1.99E-12 |
| SNHG12 | COL1A1   | 0.28  | 1.91E-12 |
| SNHG12 | RSRC2    | 0.279 | 2.09E-12 |
| SNHG12 | BCL2L12  | 0.279 | 2.12E-12 |
| SNHG12 | CDK1     | 0.279 | 2.39E-12 |
| SNHG12 | DUSP18   | 0.277 | 3.01E-12 |
| SNHG12 | RPS6KB1  | 0.272 | 8.03E-12 |
| SNHG12 | TTK      | 0.272 | 8.10E-12 |
| SNHG12 | POLR1D   | 0.272 | 7.80E-12 |
| SNHG12 | MEX3B    | 0.271 | 1.04E-11 |
| SNHG12 | ELL2     | 0.271 | 9.82E-12 |
| SNHG12 | PTPN1    | 0.268 | 1.65E-11 |
| SNHG12 | PMEP1    | 0.267 | 1.99E-11 |
| SNHG12 | TAOK2    | 0.266 | 2.47E-11 |
| SNHG12 | CDK5R1   | 0.265 | 2.77E-11 |
| SNHG12 | DTL      | 0.265 | 2.69E-11 |
| SNHG12 | STK17B   | 0.264 | 3.09E-11 |
| SNHG12 | ZNF605   | 0.264 | 3.10E-11 |
| SNHG12 | TRIM14   | 0.264 | 3.64E-11 |
| SNHG12 | CBFA2T3  | 0.256 | 1.43E-10 |
| SNHG12 | FNBP1    | 0.255 | 1.48E-10 |
| SNHG12 | DYRK2    | 0.254 | 1.75E-10 |
| SNHG12 | DEGS1    | 0.254 | 1.96E-10 |
| SNHG12 | JARID2   | 0.251 | 3.29E-10 |
| SNHG12 | CCR7     | 0.251 | 2.95E-10 |
| SNHG12 | PWWP2A   | 0.25  | 3.86E-10 |
| SNHG12 | XPO1     | 0.249 | 4.09E-10 |
| SNHG12 | INO80D   | 0.249 | 4.57E-10 |
| SNHG12 | ASAP1    | 0.248 | 5.10E-10 |
| SNHG12 | AHDC1    | 0.247 | 6.13E-10 |
| SNHG12 | CMIP     | 0.245 | 7.82E-10 |
| SNHG12 | ACTN1    | 0.244 | 9.26E-10 |
| SNHG12 | EPC1     | 0.243 | 1.26E-09 |
| SNHG12 | SCHIP1   | 0.24  | 1.84E-09 |
| SNHG12 | MARCKS   | 0.24  | 1.82E-09 |
| SNHG12 | RUBCN    | 0.239 | 2.13E-09 |
| SNHG12 | ABL2     | 0.239 | 2.27E-09 |
| SNHG12 | SALL4    | 0.239 | 2.35E-09 |
| SNHG12 | CPSF6    | 0.237 | 3.18E-09 |
| SNHG12 | HERPUD2  | 0.237 | 2.86E-09 |
| SNHG12 | RND3     | 0.236 | 3.32E-09 |
| SNHG12 | BCL11A   | 0.235 | 4.33E-09 |
| SNHG12 | MAF      | 0.233 | 5.37E-09 |
| SNHG12 | TMX3     | 0.233 | 5.25E-09 |
| SNHG12 | KDM2A    | 0.229 | 1.01E-08 |
| SNHG12 | SLC35A1  | 0.226 | 1.51E-08 |

|        |          |       |          |
|--------|----------|-------|----------|
| SNHG12 | NFKBIA   | 0.225 | 2.02E-08 |
| SNHG12 | KANSL1   | 0.225 | 1.81E-08 |
| SNHG12 | TXNDC12  | 0.224 | 2.12E-08 |
| SNHG12 | TMEM43   | 0.224 | 2.18E-08 |
| SNHG12 | FIGN     | 0.221 | 3.46E-08 |
| SNHG12 | ZNF37A   | 0.221 | 3.49E-08 |
| SNHG12 | AC005520 | 0.22  | 3.91E-08 |
| SNHG12 | SH2B3    | 0.219 | 4.71E-08 |
| SNHG12 | ZEB2     | 0.218 | 5.29E-08 |
| SNHG12 | OAS2     | 0.217 | 5.85E-08 |
| SNHG12 | SSH2     | 0.217 | 6.36E-08 |
| SNHG12 | MAFB     | 0.215 | 8.04E-08 |
| SNHG12 | ZC3H11A  | 0.214 | 9.49E-08 |
| SNHG12 | ZNF431   | 0.213 | 1.08E-07 |
| SNHG12 | RPL14    | 0.213 | 1.05E-07 |
| SNHG12 | MRPL22   | 0.213 | 1.11E-07 |
| SNHG12 | HNRNPA1  | 0.212 | 1.29E-07 |
| SNHG12 | HIC2     | 0.211 | 1.33E-07 |
| SNHG12 | BAZ2A    | 0.211 | 1.44E-07 |
| SNHG12 | KHSRP    | 0.211 | 1.35E-07 |
| SNHG12 | ZNF708   | 0.211 | 1.33E-07 |
| SNHG12 | DLX2     | 0.21  | 1.71E-07 |
| SNHG12 | UBA6     | 0.209 | 1.82E-07 |
| SNHG12 | SH3KBP1  | 0.206 | 2.76E-07 |
| SNHG12 | NREP     | 0.206 | 2.71E-07 |
| SNHG12 | ATF5     | 0.205 | 3.08E-07 |
| SNHG12 | ATF7     | 0.205 | 3.10E-07 |
| SNHG12 | PTMA     | 0.205 | 3.10E-07 |
| SNHG12 | RNF115   | 0.204 | 3.89E-07 |
| SNHG12 | SYBU     | 0.203 | 4.16E-07 |
| SNHG12 | POLH     | 0.197 | 8.80E-07 |
| SNHG12 | SP1      | 0.196 | 1.06E-06 |
| SNHG12 | TANK     | 0.194 | 1.38E-06 |
| SNHG12 | CHD1     | 0.194 | 1.39E-06 |
| SNHG12 | POM121C  | 0.193 | 1.62E-06 |
| SNHG12 | ZIC2     | 0.192 | 1.72E-06 |
| SNHG12 | SOX11    | 0.19  | 2.35E-06 |
| SNHG12 | ABHD18   | 0.19  | 2.30E-06 |
| SNHG12 | SOD2     | 0.19  | 2.12E-06 |
| SNHG12 | LPGAT1   | 0.189 | 2.62E-06 |
| SNHG12 | FOXK1    | 0.188 | 2.85E-06 |
| SNHG12 | WTAP     | 0.187 | 3.27E-06 |
| SNHG12 | STOX2    | 0.186 | 3.61E-06 |
| SNHG12 | FYN      | 0.181 | 7.13E-06 |
| SNHG12 | HMGA2    | 0.18  | 7.30E-06 |
| SNHG12 | SKI      | 0.18  | 7.20E-06 |
| SNHG12 | IRS2     | 0.18  | 8.02E-06 |
| SNHG12 | CELF1    | 0.18  | 7.69E-06 |
| SNHG12 | OTX1     | 0.179 | 8.82E-06 |
| SNHG12 | HOOK3    | 0.174 | 1.46E-05 |
| SNHG12 | C14orf28 | 0.174 | 1.56E-05 |
| SNHG12 | PSMB7    | 0.174 | 1.55E-05 |
| SNHG12 | DDIAS    | 0.172 | 1.99E-05 |
| SNHG12 | SMG1     | 0.171 | 2.12E-05 |
| SNHG12 | PITX1    | 0.171 | 2.16E-05 |
| SNHG12 | KRIT1    | 0.17  | 2.33E-05 |
| SNHG12 | SCAF4    | 0.169 | 2.65E-05 |
| SNHG12 | MKNK2    | 0.168 | 2.90E-05 |

|        |          |       |          |
|--------|----------|-------|----------|
| SNHG12 | SS18L1   | 0.166 | 3.64E-05 |
| SNHG12 | CDK13    | 0.166 | 3.63E-05 |
| SNHG12 | KLF6     | 0.165 | 4.37E-05 |
| SNHG12 | PLD3     | 0.165 | 3.96E-05 |
| SNHG12 | ZSWIM6   | 0.164 | 4.62E-05 |
| SNHG12 | COL4A1   | 0.163 | 5.32E-05 |
| SNHG12 | LMNA     | 0.163 | 5.03E-05 |
| SNHG12 | RNF125   | 0.163 | 5.40E-05 |
| SNHG12 | GSE1     | 0.163 | 5.41E-05 |
| SNHG12 | GDF11    | 0.161 | 6.15E-05 |
| SNHG12 | DUSP14   | 0.16  | 7.27E-05 |
| SNHG12 | MXD1     | 0.159 | 7.95E-05 |
| SNHG12 | KMT2D    | 0.157 | 9.39E-05 |
| SNHG12 | GPX8     | 0.154 | 0.000128 |
| SNHG12 | GGNBP2   | 0.153 | 0.000144 |
| SNHG12 | AKAP13   | 0.153 | 0.000142 |
| SNHG12 | NCK1     | 0.152 | 0.000158 |
| SNHG12 | REV1     | 0.151 | 0.000175 |
| SNHG12 | FHL1     | 0.15  | 0.00019  |
| SNHG12 | ZNF410   | 0.15  | 0.000191 |
| SNHG12 | SERTAD2  | 0.149 | 0.00022  |
| SNHG12 | ZNF740   | 0.148 | 0.000235 |
| SNHG12 | CD47     | 0.147 | 0.000269 |
| SNHG12 | SLC20A1  | 0.146 | 0.000307 |
| SNHG12 | MORC3    | 0.145 | 0.000314 |
| SNHG12 | MIS12    | 0.145 | 0.000312 |
| SNHG12 | COL11A1  | 0.145 | 0.000315 |
| SNHG12 | GPATCH2  | 0.144 | 0.00036  |
| SNHG12 | EGFR     | 0.143 | 0.000398 |
| SNHG12 | YWHAH    | 0.143 | 0.000389 |
| SNHG12 | TMEM154  | 0.143 | 0.000384 |
| SNHG12 | PLEKHA1  | 0.142 | 0.000413 |
| SNHG12 | POU4F1   | 0.141 | 0.000478 |
| SNHG12 | DPY19L1  | 0.14  | 0.000508 |
| SNHG12 | KMT2E    | 0.138 | 0.000641 |
| SNHG12 | PELI1    | 0.138 | 0.000604 |
| SNHG12 | MBNL1    | 0.138 | 0.000626 |
| SNHG12 | CCND1    | 0.137 | 0.000679 |
| SNHG12 | ABCC5    | 0.137 | 0.000658 |
| SNHG12 | STRIP1   | 0.137 | 0.000658 |
| SNHG12 | CPE      | 0.135 | 0.000818 |
| SNHG12 | ATP8B2   | 0.134 | 0.000928 |
| SNHG12 | HMGXB4   | 0.134 | 0.000927 |
| SNHG12 | E2F3     | 0.133 | 0.000942 |
| SNHG12 | CEBPZOS  | 0.132 | 0.001117 |
| SNHG12 | HNRNPUL  | 0.13  | 0.001281 |
| SNHG12 | PHIP     | 0.129 | 0.001346 |
| SNHG12 | ZNF638   | 0.129 | 0.001402 |
| SNHG12 | TBL1XR1  | 0.129 | 0.00144  |
| SNHG12 | TPM3     | 0.127 | 0.001668 |
| SNHG12 | MARCKSL1 | 0.127 | 0.001687 |
| SNHG12 | NR3C1    | 0.127 | 0.001662 |
| SNHG12 | MEIS1    | 0.126 | 0.001798 |
| SNHG12 | EIF6     | 0.126 | 0.00185  |
| SNHG12 | ADARB1   | 0.125 | 0.002041 |
| SNHG12 | CBX4     | 0.125 | 0.002022 |
| SNHG12 | SHCBP1   | 0.124 | 0.002175 |
| SNHG12 | TGIF2    | 0.124 | 0.002201 |

|        |          |       |          |
|--------|----------|-------|----------|
| SNHG12 | COL3A1   | 0.124 | 0.002099 |
| SNHG12 | LEPROTL1 | 0.124 | 0.002091 |
| SNHG12 | IDS      | 0.124 | 0.002071 |
| SNHG12 | POC1B-GA | 0.123 | 0.002302 |
| SNHG12 | BRWD1    | 0.123 | 0.002349 |
| SNHG12 | NFX1     | 0.122 | 0.002578 |
| SNHG12 | FGFR1OP2 | 0.121 | 0.002733 |
| SNHG12 | UBAP2L   | 0.12  | 0.003053 |
| SNHG12 | ZNF791   | 0.12  | 0.003052 |
| SNHG12 | C12orf43 | 0.12  | 0.002977 |
| SNHG12 | FNDC3B   | 0.119 | 0.003259 |
| SNHG12 | POU3F2   | 0.119 | 0.003174 |
| SNHG12 | MYADM    | 0.119 | 0.003255 |
| SNHG12 | RORA     | 0.118 | 0.003406 |
| SNHG12 | UBE2Z    | 0.118 | 0.00353  |
| SNHG12 | ENTPD4   | 0.118 | 0.003398 |
| SNHG12 | EXOSC3   | 0.117 | 0.003636 |
| SNHG12 | ANP32B   | 0.117 | 0.003689 |
| SNHG12 | TXNDC15  | 0.117 | 0.003889 |
| SNHG12 | MEF2D    | 0.117 | 0.003702 |
| SNHG12 | DCLRE1B  | 0.116 | 0.004245 |
| SNHG12 | FNIP1    | 0.116 | 0.003976 |
| SNHG12 | STIM2    | 0.116 | 0.004095 |
| SNHG12 | SMCHD1   | 0.115 | 0.004318 |
| SNHG12 | TSR1     | 0.115 | 0.004296 |
| SNHG12 | STK39    | 0.114 | 0.004672 |
| SNHG12 | LRIG3    | 0.113 | 0.00503  |
| SNHG12 | IRF2     | 0.112 | 0.005688 |
| SNHG12 | NUP58    | 0.112 | 0.005554 |
| SNHG12 | ZNF703   | 0.112 | 0.005534 |
| SNHG12 | PPP1R12A | 0.111 | 0.005861 |
| SNHG12 | ZMYM2    | 0.111 | 0.005916 |
| SNHG12 | PROK2    | 0.109 | 0.007072 |
| SNHG12 | CDH2     | 0.108 | 0.007727 |
| SNHG12 | FAM208B  | 0.107 | 0.007987 |
| SNHG12 | TIPARP   | 0.107 | 0.008074 |
| SNHG12 | ZNF695   | 0.107 | 0.007855 |
| SNHG12 | TUBGCP3  | 0.106 | 0.008802 |
| SNHG12 | TET2     | 0.105 | 0.009198 |
| SNHG12 | PIGC     | 0.105 | 0.009427 |
| SNHG12 | CCP110   | 0.105 | 0.009257 |
| SNHG12 | IKZF2    | 0.104 | 0.010041 |
| SNHG12 | ARID4B   | 0.103 | 0.010905 |
| SNHG12 | FOXG1    | 0.102 | 0.011501 |
| SNHG12 | MAP3K20  | 0.102 | 0.011784 |
| SNHG12 | TTBK2    | 0.102 | 0.011831 |
| SNHG12 | DDX3Y    | 0.102 | 0.011891 |
| SNHG12 | DKC1     | 0.101 | 0.012163 |
| SNHG12 | HOXC13   | 0.101 | 0.012805 |
| SNHG12 | KEAP1    | 0.101 | 0.012093 |
| SNHG12 | MBD4     | 0.1   | 0.013002 |
| SNHG12 | SSH1     | 0.099 | 0.014483 |
| SNHG12 | CALU     | 0.096 | 0.017294 |
| SNHG12 | ELF2     | 0.096 | 0.017347 |
| SNHG12 | WBP2     | 0.095 | 0.019321 |
| SNHG12 | FOXA1    | 0.093 | 0.021328 |
| SNHG12 | PGM2L1   | 0.093 | 0.021395 |
| SNHG12 | MIDN     | 0.092 | 0.023491 |

|        |          |       |          |
|--------|----------|-------|----------|
| SNHG12 | NDUFV3   | 0.091 | 0.024296 |
| SNHG12 | RC3H1    | 0.09  | 0.025536 |
| SNHG12 | MTMR4    | 0.089 | 0.028586 |
| SNHG12 | PHLDA1   | 0.088 | 0.029861 |
| SNHG12 | ETS1     | 0.086 | 0.033506 |
| SNHG12 | ATXN7    | 0.086 | 0.033851 |
| SNHG12 | CNIH4    | 0.084 | 0.037813 |
| SNHG12 | TANC2    | 0.083 | 0.041065 |
| SNHG12 | KPNB1    | 0.083 | 0.040865 |
| SNHG12 | KDELC2   | 0.082 | 0.042642 |
| SNHG12 | CAMK4    | 0.08  | 0.048716 |
| SNHG12 | ANKRD12  | 0.08  | 0.049167 |
| SNHG12 | UFM1     | 0.079 | 0.050925 |
| SNHG12 | JAZF1    | 0.079 | 0.050664 |
| SNHG12 | PITPNB   | 0.079 | 0.049975 |
| SNHG12 | CASP6    | 0.078 | 0.055464 |
| SNHG12 | SLC31A2  | 0.077 | 0.057642 |
| SNHG12 | KIF2A    | 0.077 | 0.057122 |
| SNHG12 | RBPJ     | 0.077 | 0.05734  |
| SNHG12 | CARM1    | 0.076 | 0.059174 |
| SNHG12 | RBMS1    | 0.075 | 0.062192 |
| SNHG12 | NRXN3    | 0.073 | 0.072375 |
| SNHG12 | GLCC1    | 0.073 | 0.071211 |
| SNHG12 | NEDD4    | 0.072 | 0.074914 |
| SNHG12 | TNFSF10  | 0.071 | 0.078535 |
| SNHG12 | CHML     | 0.071 | 0.078638 |
| SNHG12 | CHD7     | 0.07  | 0.082224 |
| SNHG12 | LARP1    | 0.069 | 0.086675 |
| SNHG12 | HECA     | 0.068 | 0.094814 |
| SNHG12 | MID1     | 0.068 | 0.092038 |
| SNHG12 | GALNT1   | 0.067 | 0.095913 |
| SNHG12 | PSMG2    | 0.067 | 0.096647 |
| SNHG12 | HDGF     | 0.067 | 0.099106 |
| SNHG12 | AMMECR1  | 0.066 | 0.105079 |
| SNHG12 | BAZ1B    | 0.066 | 0.103181 |
| SNHG12 | MFSD8    | 0.066 | 0.10152  |
| SNHG12 | BMP2K    | 0.065 | 0.106387 |
| SNHG12 | SLC25A36 | 0.065 | 0.105961 |
| SNHG12 | ZFHX4    | 0.065 | 0.106033 |
| SNHG12 | ABI3BP   | 0.064 | 0.113481 |
| SNHG12 | SNAPC1   | 0.063 | 0.118244 |
| SNHG12 | KMT2A    | 0.063 | 0.117773 |
| SNHG12 | NFIB     | 0.063 | 0.118601 |
| SNHG12 | CEBPG    | 0.063 | 0.117678 |
| SNHG12 | BICD2    | 0.063 | 0.120573 |
| SNHG12 | WDR26    | 0.061 | 0.133927 |
| SNHG12 | AC026786 | 0.06  | 0.135621 |
| SNHG12 | OXR1     | 0.06  | 0.141255 |
| SNHG12 | PAPOLG   | 0.06  | 0.139814 |
| SNHG12 | IRGQ     | 0.059 | 0.143153 |
| SNHG12 | POU2F1   | 0.059 | 0.142372 |
| SNHG12 | CNDP2    | 0.059 | 0.145625 |
| SNHG12 | ELMSAN1  | 0.057 | 0.159691 |
| SNHG12 | TCF4     | 0.056 | 0.16929  |
| SNHG12 | SNRPC    | 0.056 | 0.167437 |
| SNHG12 | FAM160B1 | 0.055 | 0.17452  |
| SNHG12 | NR2C2    | 0.055 | 0.174916 |
| SNHG12 | GLUL     | 0.055 | 0.176729 |

|        |         |       |          |
|--------|---------|-------|----------|
| SNHG12 | SMNDC1  | 0.054 | 0.180346 |
| SNHG12 | ONECUT2 | 0.053 | 0.194691 |
| SNHG12 | ZBTB34  | 0.053 | 0.190348 |
| SNHG12 | LIPA    | 0.052 | 0.199921 |
| SNHG12 | GOLT1B  | 0.052 | 0.203492 |
| SNHG12 | PLEKHA2 | 0.051 | 0.207058 |
| SNHG12 | IFRD2   | 0.05  | 0.216027 |
| SNHG12 | ING3    | 0.05  | 0.220883 |
| SNHG12 | YWHAZ   | 0.049 | 0.222844 |
| SNHG12 | ELK4    | 0.049 | 0.225607 |
| SNHG12 | ZNF623  | 0.048 | 0.236099 |
| SNHG12 | RAC1    | 0.048 | 0.233132 |
| SNHG12 | MAST4   | 0.048 | 0.234515 |
| SNHG12 | NFIA    | 0.047 | 0.248569 |
| SNHG12 | JDP2    | 0.047 | 0.24708  |
| SNHG12 | MARK2   | 0.047 | 0.248337 |
| SNHG12 | ZBTB8A  | 0.047 | 0.242871 |
| SNHG12 | SLC7A2  | 0.046 | 0.259468 |
| SNHG12 | ZBTB7A  | 0.046 | 0.25455  |
| SNHG12 | RAI14   | 0.045 | 0.263229 |
| SNHG12 | DGKE    | 0.044 | 0.282782 |
| SNHG12 | CEP350  | 0.044 | 0.28014  |
| SNHG12 | SOX9    | 0.043 | 0.284413 |
| SNHG12 | NBN     | 0.043 | 0.287512 |
| SNHG12 | TSPAN13 | 0.043 | 0.292052 |
| SNHG12 | MAP3K2  | 0.043 | 0.293361 |
| SNHG12 | SGK3    | 0.043 | 0.286247 |
| SNHG12 | LIMS1   | 0.042 | 0.296    |
| SNHG12 | NPEPPS  | 0.041 | 0.313597 |
| SNHG12 | MAP1B   | 0.04  | 0.317706 |
| SNHG12 | TMA16   | 0.04  | 0.325513 |
| SNHG12 | TMEM250 | 0.039 | 0.341516 |
| SNHG12 | TTPAL   | 0.036 | 0.370395 |
| SNHG12 | ZBTB43  | 0.036 | 0.372511 |
| SNHG12 | SLC35E1 | 0.036 | 0.380744 |
| SNHG12 | SPOP    | 0.036 | 0.375737 |
| SNHG12 | RFX7    | 0.035 | 0.392821 |
| SNHG12 | AKAP10  | 0.035 | 0.387004 |
| SNHG12 | HNRNPH3 | 0.035 | 0.388279 |
| SNHG12 | HNRNPA3 | 0.035 | 0.385632 |
| SNHG12 | GPBP1   | 0.035 | 0.385038 |
| SNHG12 | SUMO2   | 0.034 | 0.403358 |
| SNHG12 | RSL24D1 | 0.034 | 0.405716 |
| SNHG12 | HMGB1   | 0.031 | 0.440541 |
| SNHG12 | ARHGAP3 | 0.031 | 0.440549 |
| SNHG12 | TMPO    | 0.031 | 0.444978 |
| SNHG12 | TXN     | 0.03  | 0.455873 |
| SNHG12 | KPNA5   | 0.03  | 0.457553 |
| SNHG12 | R3HDM1  | 0.029 | 0.47846  |
| SNHG12 | CKAP4   | 0.028 | 0.495303 |
| SNHG12 | TMEFF1  | 0.028 | 0.483211 |
| SNHG12 | FAR1    | 0.027 | 0.509702 |
| SNHG12 | EIF4A2  | 0.027 | 0.507074 |
| SNHG12 | ATP13A3 | 0.026 | 0.513665 |
| SNHG12 | EMP2    | 0.026 | 0.515866 |
| SNHG12 | LRIG1   | 0.026 | 0.515184 |
| SNHG12 | MED13L  | 0.025 | 0.54063  |
| SNHG12 | ETV1    | 0.025 | 0.541804 |



|        |          |        |          |
|--------|----------|--------|----------|
| SNHG12 | ELK3     | 0.024  | 0.553501 |
| SNHG12 | MTR      | 0.024  | 0.547546 |
| SNHG12 | TNRC6C   | 0.024  | 0.557273 |
| SNHG12 | SLC10A7  | 0.022  | 0.591647 |
| SNHG12 | DNAJC24  | 0.021  | 0.612813 |
| SNHG12 | BCAP29   | 0.02   | 0.616797 |
| SNHG12 | C11orf49 | 0.019  | 0.647148 |
| SNHG12 | PGK1     | 0.019  | 0.642915 |
| SNHG12 | TCF20    | 0.019  | 0.635143 |
| SNHG12 | ZFP36L1  | 0.019  | 0.645039 |
| SNHG12 | KBTBD2   | 0.018  | 0.654705 |
| SNHG12 | FKBP14   | 0.018  | 0.652969 |
| SNHG12 | CCDC170  | 0.017  | 0.683934 |
| SNHG12 | CREBBP   | 0.017  | 0.670875 |
| SNHG12 | VPS13A   | 0.016  | 0.699266 |
| SNHG12 | MAP3K7   | 0.016  | 0.694231 |
| SNHG12 | ZFAND5   | 0.016  | 0.687412 |
| SNHG12 | FBXO45   | 0.015  | 0.702623 |
| SNHG12 | KIAA1586 | 0.014  | 0.722509 |
| SNHG12 | CCDC6    | 0.014  | 0.734105 |
| SNHG12 | TRA2B    | 0.013  | 0.757091 |
| SNHG12 | ADAMTS5  | 0.011  | 0.78821  |
| SNHG12 | SLC7A1   | 0.011  | 0.782795 |
| SNHG12 | GNA12    | 0.011  | 0.779148 |
| SNHG12 | GATA6    | 0.01   | 0.797804 |
| SNHG12 | GATAD2B  | 0.009  | 0.833788 |
| SNHG12 | EPHA7    | 0.009  | 0.831742 |
| SNHG12 | MOSPD2   | 0.008  | 0.839005 |
| SNHG12 | CCDC43   | 0.008  | 0.834987 |
| SNHG12 | ETS2     | 0.007  | 0.870801 |
| SNHG12 | ZNF451   | 0.006  | 0.879149 |
| SNHG12 | TNRC6B   | 0.005  | 0.895769 |
| SNHG12 | F3       | 0.003  | 0.93949  |
| SNHG12 | KCNK1    | 0.003  | 0.945895 |
| SNHG12 | PURB     | 0.002  | 0.958102 |
| SNHG12 | NUFIP2   | 0.002  | 0.967023 |
| SNHG12 | LRR1     | 0      | 0.995042 |
| SNHG12 | NUP50    | 0      | 0.990454 |
| SNHG12 | AK2      | 0      | 0.991588 |
| SNHG12 | ZNRF1    | -0.001 | 0.972982 |
| SNHG12 | CAST     | -0.001 | 0.974275 |
| SNHG12 | RASA1    | -0.002 | 0.968839 |
| SNHG12 | SRSF3    | -0.003 | 0.937204 |
| SNHG12 | ZNF280B  | -0.004 | 0.912214 |
| SNHG12 | CTDSPL2  | -0.005 | 0.897598 |
| SNHG12 | PCOLCE2  | -0.005 | 0.893083 |
| SNHG12 | DDX50    | -0.007 | 0.855582 |
| SNHG12 | ARID4A   | -0.007 | 0.867282 |
| SNHG12 | MSANTD3  | -0.007 | 0.86278  |
| SNHG12 | ACER3    | -0.009 | 0.818797 |
| SNHG12 | RERE     | -0.011 | 0.784164 |
| SNHG12 | PBX3     | -0.011 | 0.782318 |
| SNHG12 | PSMD12   | -0.011 | 0.793932 |
| SNHG12 | KLHL20   | -0.011 | 0.785821 |
| SNHG12 | S1PR3    | -0.012 | 0.773345 |
| SNHG12 | KCTD20   | -0.012 | 0.773736 |
| SNHG12 | VPS45    | -0.012 | 0.770036 |
| SNHG12 | ZBTB5    | -0.013 | 0.751766 |

|        |         |        |          |
|--------|---------|--------|----------|
| SNHG12 | DESI2   | -0.014 | 0.724603 |
| SNHG12 | KMT2C   | -0.014 | 0.732224 |
| SNHG12 | SEC23A  | -0.015 | 0.707647 |
| SNHG12 | CDK6    | -0.015 | 0.705973 |
| SNHG12 | SGTB    | -0.015 | 0.717367 |
| SNHG12 | ZNF503  | -0.016 | 0.693883 |
| SNHG12 | SESN1   | -0.016 | 0.692465 |
| SNHG12 | KHDRBS1 | -0.016 | 0.696937 |
| SNHG12 | POLD3   | -0.016 | 0.698078 |
| SNHG12 | NKRF    | -0.017 | 0.674674 |
| SNHG12 | N4BP2   | -0.017 | 0.675252 |
| SNHG12 | USP42   | -0.018 | 0.649585 |
| SNHG12 | PHC3    | -0.018 | 0.651514 |
| SNHG12 | GALNT7  | -0.019 | 0.634708 |
| SNHG12 | SEC61A1 | -0.02  | 0.62365  |
| SNHG12 | ZKSCAN1 | -0.02  | 0.615423 |
| SNHG12 | ARID2   | -0.021 | 0.596011 |
| SNHG12 | FOXD1   | -0.021 | 0.604607 |
| SNHG12 | CDK12   | -0.022 | 0.592062 |
| SNHG12 | YWHAG   | -0.022 | 0.579741 |
| SNHG12 | PCBP2   | -0.022 | 0.585197 |
| SNHG12 | SP3     | -0.023 | 0.573883 |
| SNHG12 | L3MBTL3 | -0.023 | 0.571391 |
| SNHG12 | ZNF281  | -0.023 | 0.572728 |
| SNHG12 | ROBO1   | -0.023 | 0.564718 |
| SNHG12 | BLOC1S6 | -0.024 | 0.547048 |
| SNHG12 | TMEM126 | -0.024 | 0.56038  |
| SNHG12 | ESR1    | -0.026 | 0.515871 |
| SNHG12 | STAT5B  | -0.026 | 0.526683 |
| SNHG12 | SOAT1   | -0.027 | 0.508131 |
| SNHG12 | TXNDC5  | -0.027 | 0.500427 |
| SNHG12 | LRRC8A  | -0.028 | 0.492606 |
| SNHG12 | SPIN4   | -0.03  | 0.458756 |
| SNHG12 | ACTR3   | -0.031 | 0.442301 |
| SNHG12 | FRYL    | -0.033 | 0.414723 |
| SNHG12 | EEA1    | -0.033 | 0.412879 |
| SNHG12 | THADA   | -0.033 | 0.415874 |
| SNHG12 | CFAP20  | -0.034 | 0.395553 |
| SNHG12 | RAB22A  | -0.034 | 0.401396 |
| SNHG12 | BOLA3   | -0.034 | 0.400581 |
| SNHG12 | PTX3    | -0.035 | 0.38537  |
| SNHG12 | ASPH    | -0.035 | 0.382126 |
| SNHG12 | PRDM2   | -0.036 | 0.375422 |
| SNHG12 | C6orf62 | -0.036 | 0.369739 |
| SNHG12 | MLEC    | -0.037 | 0.355508 |
| SNHG12 | YOD1    | -0.038 | 0.349143 |
| SNHG12 | NUMB    | -0.038 | 0.346245 |
| SNHG12 | RBFOX2  | -0.038 | 0.348442 |
| SNHG12 | SNAPC3  | -0.039 | 0.33567  |
| SNHG12 | BAZ2B   | -0.04  | 0.328659 |
| SNHG12 | PHF20   | -0.04  | 0.326014 |
| SNHG12 | ERG     | -0.041 | 0.313574 |
| SNHG12 | PERP    | -0.041 | 0.313651 |
| SNHG12 | KLHL28  | -0.042 | 0.302193 |
| SNHG12 | GXYLT1  | -0.042 | 0.301999 |
| SNHG12 | DENND6A | -0.043 | 0.29268  |
| SNHG12 | LYRM1   | -0.043 | 0.283809 |
| SNHG12 | MED14   | -0.043 | 0.287553 |

|        |          |        |          |
|--------|----------|--------|----------|
| SNHG12 | MTX3     | -0.043 | 0.283767 |
| SNHG12 | PANK2    | -0.046 | 0.257176 |
| SNHG12 | KIF3A    | -0.046 | 0.259002 |
| SNHG12 | C9orf40  | -0.047 | 0.250165 |
| SNHG12 | WNT5A    | -0.048 | 0.236903 |
| SNHG12 | FBN2     | -0.048 | 0.240536 |
| SNHG12 | SERINC3  | -0.048 | 0.235914 |
| SNHG12 | STX3     | -0.05  | 0.218106 |
| SNHG12 | LBR      | -0.05  | 0.220115 |
| SNHG12 | ACAP2    | -0.05  | 0.216443 |
| SNHG12 | THOC7    | -0.05  | 0.216744 |
| SNHG12 | ARNT     | -0.05  | 0.216649 |
| SNHG12 | DMD      | -0.05  | 0.214147 |
| SNHG12 | PLAGL2   | -0.052 | 0.195399 |
| SNHG12 | ARL8A    | -0.053 | 0.194946 |
| SNHG12 | CENPQ    | -0.053 | 0.191823 |
| SNHG12 | BPTF     | -0.053 | 0.191464 |
| SNHG12 | MSN      | -0.056 | 0.165376 |
| SNHG12 | SIPA1L1  | -0.056 | 0.163302 |
| SNHG12 | TPBG     | -0.056 | 0.165951 |
| SNHG12 | FAM217B  | -0.057 | 0.156243 |
| SNHG12 | ARL5B    | -0.058 | 0.153602 |
| SNHG12 | STYX     | -0.058 | 0.154844 |
| SNHG12 | ZNF91    | -0.059 | 0.146939 |
| SNHG12 | SIKE1    | -0.059 | 0.14712  |
| SNHG12 | PHF8     | -0.06  | 0.140617 |
| SNHG12 | ANAPC16  | -0.061 | 0.133874 |
| SNHG12 | SEMA3C   | -0.061 | 0.132958 |
| SNHG12 | BTBD3    | -0.061 | 0.132956 |
| SNHG12 | NFIC     | -0.062 | 0.128725 |
| SNHG12 | RCOR1    | -0.062 | 0.122996 |
| SNHG12 | WWTR1    | -0.063 | 0.119821 |
| SNHG12 | DYRK1A   | -0.063 | 0.119686 |
| SNHG12 | EPAS1    | -0.064 | 0.112249 |
| SNHG12 | NIPBL    | -0.064 | 0.11289  |
| SNHG12 | BCL7B    | -0.066 | 0.105472 |
| SNHG12 | MKRN1    | -0.067 | 0.096229 |
| SNHG12 | VPS53    | -0.067 | 0.098535 |
| SNHG12 | WAC      | -0.067 | 0.096676 |
| SNHG12 | MACO1    | -0.067 | 0.10028  |
| SNHG12 | EIF4G3   | -0.068 | 0.094536 |
| SNHG12 | ZBTB20   | -0.068 | 0.094502 |
| SNHG12 | ITPRIPL2 | -0.069 | 0.088852 |
| SNHG12 | KIF5C    | -0.069 | 0.089336 |
| SNHG12 | TTC3     | -0.069 | 0.086396 |
| SNHG12 | IGF2BP2  | -0.069 | 0.087712 |
| SNHG12 | TRIM71   | -0.07  | 0.085301 |
| SNHG12 | CACUL1   | -0.07  | 0.084224 |
| SNHG12 | OTUD6B   | -0.071 | 0.077536 |
| SNHG12 | ZFP91-CN | -0.071 | 0.080867 |
| SNHG12 | EXT1     | -0.072 | 0.076867 |
| SNHG12 | DNAJC12  | -0.072 | 0.076022 |
| SNHG12 | SOX4     | -0.072 | 0.075068 |
| SNHG12 | KIAA1429 | -0.073 | 0.071716 |
| SNHG12 | DCTN4    | -0.074 | 0.066657 |
| SNHG12 | UBE2J1   | -0.074 | 0.067679 |
| SNHG12 | EPM2AIP1 | -0.075 | 0.065143 |
| SNHG12 | SARAF    | -0.075 | 0.063159 |

|        |          |        |          |
|--------|----------|--------|----------|
| SNHG12 | IFT74    | -0.076 | 0.060816 |
| SNHG12 | PTEN     | -0.077 | 0.056779 |
| SNHG12 | FAM13B   | -0.078 | 0.053353 |
| SNHG12 | SBNO1    | -0.078 | 0.05344  |
| SNHG12 | SNRNP27  | -0.079 | 0.050281 |
| SNHG12 | GPRC5A   | -0.079 | 0.049786 |
| SNHG12 | CTTNBP2N | -0.079 | 0.052358 |
| SNHG12 | TC2N     | -0.079 | 0.049595 |
| SNHG12 | RBM4     | -0.079 | 0.051168 |
| SNHG12 | METTL21A | -0.08  | 0.047314 |
| SNHG12 | EDEM3    | -0.082 | 0.042851 |
| SNHG12 | QKI      | -0.082 | 0.042059 |
| SNHG12 | FOXO3    | -0.083 | 0.040096 |
| SNHG12 | SPIRE1   | -0.083 | 0.040128 |
| SNHG12 | RBM27    | -0.083 | 0.039529 |
| SNHG12 | SNX16    | -0.084 | 0.038772 |
| SNHG12 | ZNF551   | -0.084 | 0.038641 |
| SNHG12 | EIF4B    | -0.084 | 0.038356 |
| SNHG12 | GOLGA5   | -0.084 | 0.038561 |
| SNHG12 | SETDB2   | -0.085 | 0.035849 |
| SNHG12 | CDC27    | -0.085 | 0.036355 |
| SNHG12 | ZNF720   | -0.086 | 0.034365 |
| SNHG12 | PTP4A2   | -0.086 | 0.034001 |
| SNHG12 | AJUBA    | -0.086 | 0.032702 |
| SNHG12 | LPP      | -0.087 | 0.031813 |
| SNHG12 | UBE2A    | -0.087 | 0.03199  |
| SNHG12 | CREM     | -0.087 | 0.032379 |
| SNHG12 | SPPL3    | -0.088 | 0.029048 |
| SNHG12 | MIER1    | -0.089 | 0.027961 |
| SNHG12 | LNPEP    | -0.09  | 0.026619 |
| SNHG12 | ZFP36L2  | -0.09  | 0.025874 |
| SNHG12 | UBE2D1   | -0.09  | 0.026208 |
| SNHG12 | PKN2     | -0.09  | 0.025298 |
| SNHG12 | IGFBP7   | -0.09  | 0.026422 |
| SNHG12 | LCOR     | -0.091 | 0.024897 |
| SNHG12 | PDS5A    | -0.092 | 0.023591 |
| SNHG12 | UBXN7    | -0.092 | 0.022632 |
| SNHG12 | EIF5B    | -0.092 | 0.022559 |
| SNHG12 | GAPVD1   | -0.093 | 0.021813 |
| SNHG12 | PKP2     | -0.093 | 0.021764 |
| SNHG12 | MYLIP    | -0.093 | 0.021676 |
| SNHG12 | NIP7     | -0.094 | 0.019666 |
| SNHG12 | BICC1    | -0.094 | 0.020487 |
| SNHG12 | BCL10    | -0.094 | 0.020069 |
| SNHG12 | LMTK2    | -0.095 | 0.019393 |
| SNHG12 | H3F3A    | -0.096 | 0.017781 |
| SNHG12 | DEK      | -0.096 | 0.017473 |
| SNHG12 | FOXP4    | -0.097 | 0.016802 |
| SNHG12 | UBE2V2   | -0.098 | 0.014922 |
| SNHG12 | DPY19L3  | -0.098 | 0.01534  |
| SNHG12 | HOXA5    | -0.098 | 0.015757 |
| SNHG12 | FST      | -0.099 | 0.013922 |
| SNHG12 | TMEM123  | -0.101 | 0.012144 |
| SNHG12 | TRPS1    | -0.102 | 0.011589 |
| SNHG12 | INTS6    | -0.102 | 0.011475 |
| SNHG12 | ZBTB18   | -0.102 | 0.011608 |
| SNHG12 | VPS13B   | -0.104 | 0.010251 |
| SNHG12 | EIF2AK2  | -0.104 | 0.009814 |

|        |          |        |          |
|--------|----------|--------|----------|
| SNHG12 | RAD1     | -0.105 | 0.00951  |
| SNHG12 | PHF3     | -0.105 | 0.00946  |
| SNHG12 | ROCK1    | -0.105 | 0.009577 |
| SNHG12 | ARL6IP5  | -0.106 | 0.008853 |
| SNHG12 | ZNF480   | -0.106 | 0.008691 |
| SNHG12 | ELAVL1   | -0.107 | 0.007873 |
| SNHG12 | SNTB2    | -0.109 | 0.006856 |
| SNHG12 | CLIP1    | -0.109 | 0.007072 |
| SNHG12 | SHANK2   | -0.11  | 0.006314 |
| SNHG12 | SETD7    | -0.11  | 0.006458 |
| SNHG12 | CAMK2D   | -0.11  | 0.006394 |
| SNHG12 | PRKCD    | -0.111 | 0.006181 |
| SNHG12 | ZFHX3    | -0.111 | 0.005839 |
| SNHG12 | AMOTL2   | -0.114 | 0.004778 |
| SNHG12 | FCHO2    | -0.114 | 0.00479  |
| SNHG12 | RPL7L1   | -0.117 | 0.003776 |
| SNHG12 | EMP1     | -0.117 | 0.00392  |
| SNHG12 | KDM5A    | -0.118 | 0.003562 |
| SNHG12 | LATS1    | -0.118 | 0.003491 |
| SNHG12 | PIK3R1   | -0.118 | 0.003588 |
| SNHG12 | SPOCK1   | -0.119 | 0.003331 |
| SNHG12 | ZBED6    | -0.119 | 0.003214 |
| SNHG12 | NMD3     | -0.119 | 0.003093 |
| SNHG12 | DDX18    | -0.119 | 0.003173 |
| SNHG12 | DAB2IP   | -0.121 | 0.002683 |
| SNHG12 | CNBP     | -0.121 | 0.002656 |
| SNHG12 | UTP23    | -0.121 | 0.002844 |
| SNHG12 | GCLM     | -0.122 | 0.002505 |
| SNHG12 | ADAR     | -0.122 | 0.002549 |
| SNHG12 | USP37    | -0.122 | 0.002561 |
| SNHG12 | DDX21    | -0.122 | 0.002421 |
| SNHG12 | USP47    | -0.122 | 0.002496 |
| SNHG12 | DST      | -0.124 | 0.002171 |
| SNHG12 | GOLGB1   | -0.125 | 0.001997 |
| SNHG12 | OTUD7B   | -0.125 | 0.001932 |
| SNHG12 | PPP6R3   | -0.128 | 0.00153  |
| SNHG12 | DLC1     | -0.128 | 0.001492 |
| SNHG12 | NUP205   | -0.129 | 0.001426 |
| SNHG12 | CSNK1G1  | -0.129 | 0.001388 |
| SNHG12 | RNF2     | -0.129 | 0.001388 |
| SNHG12 | SWAP70   | -0.13  | 0.001296 |
| SNHG12 | CDC42SE2 | -0.13  | 0.001311 |
| SNHG12 | CHD9     | -0.131 | 0.001157 |
| SNHG12 | TSHZ1    | -0.133 | 0.000971 |
| SNHG12 | PIKFYVE  | -0.134 | 0.000913 |
| SNHG12 | GCC2     | -0.134 | 0.00088  |
| SNHG12 | MAP3K1   | -0.134 | 0.000923 |
| SNHG12 | TULP4    | -0.134 | 0.000864 |
| SNHG12 | ZMIZ1    | -0.135 | 0.000808 |
| SNHG12 | PGRMC2   | -0.136 | 0.000724 |
| SNHG12 | PTGES3   | -0.136 | 0.000764 |
| SNHG12 | YIPF5    | -0.137 | 0.000663 |
| SNHG12 | ABCE1    | -0.137 | 0.000681 |
| SNHG12 | CNOT4    | -0.138 | 0.000617 |
| SNHG12 | PHACTR2  | -0.138 | 0.000636 |
| SNHG12 | C11orf58 | -0.138 | 0.000638 |
| SNHG12 | B4GALT1  | -0.139 | 0.000575 |
| SNHG12 | SNX3     | -0.14  | 0.000522 |

|        |          |        |          |
|--------|----------|--------|----------|
| SNHG12 | ROCK2    | -0.14  | 0.000537 |
| SNHG12 | TRAM1    | -0.14  | 0.000497 |
| SNHG12 | HAUS2    | -0.141 | 0.000485 |
| SNHG12 | KCTD10   | -0.141 | 0.000478 |
| SNHG12 | KLF13    | -0.141 | 0.000477 |
| SNHG12 | UBE4B    | -0.142 | 0.00045  |
| SNHG12 | PTAR1    | -0.142 | 0.000447 |
| SNHG12 | SNX27    | -0.143 | 0.000389 |
| SNHG12 | RB1CC1   | -0.143 | 0.000384 |
| SNHG12 | RTF1     | -0.143 | 0.000407 |
| SNHG12 | RSBN1    | -0.144 | 0.000359 |
| SNHG12 | STAT3    | -0.144 | 0.000369 |
| SNHG12 | CHD6     | -0.146 | 0.000283 |
| SNHG12 | PCNP     | -0.146 | 0.000296 |
| SNHG12 | KMT5B    | -0.148 | 0.000242 |
| SNHG12 | ZNF112   | -0.149 | 0.000222 |
| SNHG12 | VKORC1L1 | -0.15  | 0.000203 |
| SNHG12 | WIPF2    | -0.15  | 0.000206 |
| SNHG12 | ADAM10   | -0.15  | 0.000202 |
| SNHG12 | MBNL2    | -0.15  | 0.000202 |
| SNHG12 | MYO9A    | -0.151 | 0.000187 |
| SNHG12 | CAMTA1   | -0.151 | 0.000184 |
| SNHG12 | SPCS3    | -0.151 | 0.000184 |
| SNHG12 | NUP153   | -0.151 | 0.000175 |
| SNHG12 | G3BP1    | -0.152 | 0.000164 |
| SNHG12 | DFFA     | -0.153 | 0.000148 |
| SNHG12 | ZBTB41   | -0.153 | 0.000153 |
| SNHG12 | CCNYL1   | -0.153 | 0.000148 |
| SNHG12 | STRN3    | -0.154 | 0.000136 |
| SNHG12 | CSNK1A1  | -0.154 | 0.000133 |
| SNHG12 | AFF1     | -0.154 | 0.000129 |
| SNHG12 | MBLAC2   | -0.156 | 0.000112 |
| SNHG12 | MEF2A    | -0.156 | 0.000111 |
| SNHG12 | FOXP1    | -0.156 | 0.000106 |
| SNHG12 | ICE1     | -0.156 | 0.000113 |
| SNHG12 | PRRC1    | -0.156 | 0.00011  |
| SNHG12 | ARIH1    | -0.157 | 9.43E-05 |
| SNHG12 | EP300    | -0.158 | 9.20E-05 |
| SNHG12 | DICER1   | -0.159 | 8.10E-05 |
| SNHG12 | LSM12    | -0.159 | 7.70E-05 |
| SNHG12 | HNRNPA0  | -0.159 | 8.28E-05 |
| SNHG12 | IPCEF1   | -0.16  | 7.25E-05 |
| SNHG12 | TOMM20   | -0.16  | 7.19E-05 |
| SNHG12 | KAT6B    | -0.161 | 6.29E-05 |
| SNHG12 | ESD      | -0.162 | 5.82E-05 |
| SNHG12 | LIN54    | -0.163 | 5.22E-05 |
| SNHG12 | PRRG4    | -0.164 | 4.63E-05 |
| SNHG12 | G2E3     | -0.164 | 4.69E-05 |
| SNHG12 | UFL1     | -0.164 | 4.66E-05 |
| SNHG12 | UCHL3    | -0.164 | 4.66E-05 |
| SNHG12 | STK38L   | -0.165 | 4.30E-05 |
| SNHG12 | ADD1     | -0.165 | 4.14E-05 |
| SNHG12 | TRIM33   | -0.165 | 3.97E-05 |
| SNHG12 | ID4      | -0.165 | 3.96E-05 |
| SNHG12 | ARID5B   | -0.166 | 3.71E-05 |
| SNHG12 | MECP2    | -0.166 | 3.70E-05 |
| SNHG12 | RAP1A    | -0.166 | 3.57E-05 |
| SNHG12 | YY1      | -0.167 | 3.37E-05 |

|        |          |        |          |
|--------|----------|--------|----------|
| SNHG12 | SETX     | -0.168 | 3.06E-05 |
| SNHG12 | MIER3    | -0.168 | 2.89E-05 |
| SNHG12 | HIPK2    | -0.169 | 2.71E-05 |
| SNHG12 | DIS3     | -0.169 | 2.59E-05 |
| SNHG12 | ADIPOR2  | -0.169 | 2.62E-05 |
| SNHG12 | YIPF4    | -0.169 | 2.60E-05 |
| SNHG12 | VGLL3    | -0.17  | 2.40E-05 |
| SNHG12 | ZFYVE16  | -0.17  | 2.44E-05 |
| SNHG12 | DNAJA3   | -0.171 | 2.25E-05 |
| SNHG12 | UBE4A    | -0.171 | 2.20E-05 |
| SNHG12 | AMMECR1  | -0.172 | 1.97E-05 |
| SNHG12 | DNAJC13  | -0.172 | 1.91E-05 |
| SNHG12 | TMTC3    | -0.173 | 1.66E-05 |
| SNHG12 | MME      | -0.173 | 1.73E-05 |
| SNHG12 | BTBD7    | -0.174 | 1.60E-05 |
| SNHG12 | ACTR2    | -0.174 | 1.59E-05 |
| SNHG12 | LRRFIP1  | -0.174 | 1.50E-05 |
| SNHG12 | PHAX     | -0.175 | 1.34E-05 |
| SNHG12 | SOCS5    | -0.175 | 1.29E-05 |
| SNHG12 | SYNCRIP  | -0.176 | 1.16E-05 |
| SNHG12 | DR1      | -0.176 | 1.16E-05 |
| SNHG12 | CYP1B1   | -0.177 | 1.09E-05 |
| SNHG12 | PALLD    | -0.177 | 1.10E-05 |
| SNHG12 | EGR1     | -0.178 | 1.00E-05 |
| SNHG12 | ELF1     | -0.179 | 8.78E-06 |
| SNHG12 | CREBRF   | -0.179 | 8.21E-06 |
| SNHG12 | GABPA    | -0.18  | 7.75E-06 |
| SNHG12 | ARL13B   | -0.18  | 7.64E-06 |
| SNHG12 | JAK1     | -0.181 | 6.97E-06 |
| SNHG12 | CA12     | -0.181 | 6.97E-06 |
| SNHG12 | ATP2B1   | -0.182 | 5.92E-06 |
| SNHG12 | KAT6A    | -0.183 | 5.60E-06 |
| SNHG12 | EEF1A1   | -0.186 | 3.68E-06 |
| SNHG12 | SLC26A2  | -0.186 | 3.51E-06 |
| SNHG12 | C6orf106 | -0.187 | 3.20E-06 |
| SNHG12 | PSD3     | -0.187 | 3.35E-06 |
| SNHG12 | FZD3     | -0.188 | 2.78E-06 |
| SNHG12 | IGFBP5   | -0.188 | 2.80E-06 |
| SNHG12 | SMAD5    | -0.189 | 2.57E-06 |
| SNHG12 | SELENOF  | -0.19  | 2.23E-06 |
| SNHG12 | TROVE2   | -0.191 | 2.02E-06 |
| SNHG12 | HSPA13   | -0.191 | 2.07E-06 |
| SNHG12 | EFR3A    | -0.191 | 1.88E-06 |
| SNHG12 | ZBTB38   | -0.192 | 1.68E-06 |
| SNHG12 | THBS1    | -0.192 | 1.74E-06 |
| SNHG12 | HDGFL3   | -0.192 | 1.73E-06 |
| SNHG12 | NF1      | -0.193 | 1.64E-06 |
| SNHG12 | KDSR     | -0.193 | 1.58E-06 |
| SNHG12 | RECK     | -0.194 | 1.36E-06 |
| SNHG12 | MTFMT    | -0.195 | 1.19E-06 |
| SNHG12 | TAOK1    | -0.195 | 1.15E-06 |
| SNHG12 | USP13    | -0.196 | 1.05E-06 |
| SNHG12 | AFF4     | -0.197 | 8.97E-07 |
| SNHG12 | JADE1    | -0.197 | 9.61E-07 |
| SNHG12 | NRIP1    | -0.197 | 9.59E-07 |
| SNHG12 | EXOC8    | -0.197 | 8.89E-07 |
| SNHG12 | VANGL1   | -0.197 | 9.44E-07 |
| SNHG12 | SFMBT1   | -0.198 | 7.79E-07 |

|        |          |        |          |
|--------|----------|--------|----------|
| SNHG12 | KAT5     | -0.198 | 7.67E-07 |
| SNHG12 | NEK7     | -0.2   | 6.58E-07 |
| SNHG12 | KLF9     | -0.2   | 6.16E-07 |
| SNHG12 | SOBP     | -0.2   | 5.88E-07 |
| SNHG12 | FBXO11   | -0.203 | 4.06E-07 |
| SNHG12 | AASDH    | -0.203 | 4.24E-07 |
| SNHG12 | KLHL24   | -0.204 | 3.87E-07 |
| SNHG12 | CDV3     | -0.204 | 3.66E-07 |
| SNHG12 | RAB4A    | -0.204 | 3.57E-07 |
| SNHG12 | CDC42EP3 | -0.205 | 3.06E-07 |
| SNHG12 | CUX1     | -0.205 | 3.24E-07 |
| SNHG12 | THUMPD1  | -0.205 | 3.38E-07 |
| SNHG12 | HOXA11   | -0.205 | 3.28E-07 |
| SNHG12 | CXXC5    | -0.206 | 2.75E-07 |
| SNHG12 | SPART    | -0.206 | 2.97E-07 |
| SNHG12 | NFAT5    | -0.206 | 2.74E-07 |
| SNHG12 | ZFP1     | -0.207 | 2.53E-07 |
| SNHG12 | SNAP29   | -0.207 | 2.56E-07 |
| SNHG12 | FZD6     | -0.207 | 2.42E-07 |
| SNHG12 | ZMAT2    | -0.207 | 2.38E-07 |
| SNHG12 | TCF12    | -0.207 | 2.37E-07 |
| SNHG12 | EIF5A2   | -0.208 | 2.28E-07 |
| SNHG12 | SMAD4    | -0.209 | 1.91E-07 |
| SNHG12 | TRIM24   | -0.209 | 1.76E-07 |
| SNHG12 | FUBP3    | -0.21  | 1.65E-07 |
| SNHG12 | TOP1     | -0.211 | 1.41E-07 |
| SNHG12 | ASH1L    | -0.211 | 1.46E-07 |
| SNHG12 | RPS6KA3  | -0.211 | 1.37E-07 |
| SNHG12 | ELMOD2   | -0.211 | 1.39E-07 |
| SNHG12 | NDUFA8   | -0.213 | 1.14E-07 |
| SNHG12 | IGF1R    | -0.213 | 1.09E-07 |
| SNHG12 | SMAD2    | -0.213 | 1.05E-07 |
| SNHG12 | FOXN3    | -0.214 | 9.76E-08 |
| SNHG12 | ARID1B   | -0.214 | 8.74E-08 |
| SNHG12 | PDIK1L   | -0.214 | 9.71E-08 |
| SNHG12 | HIP1     | -0.215 | 8.05E-08 |
| SNHG12 | ACTN4    | -0.215 | 8.53E-08 |
| SNHG12 | STX12    | -0.215 | 8.02E-08 |
| SNHG12 | YWHAQ    | -0.217 | 5.96E-08 |
| SNHG12 | HDAC2    | -0.219 | 4.86E-08 |
| SNHG12 | GALNT4   | -0.219 | 4.51E-08 |
| SNHG12 | ZNF35    | -0.22  | 3.87E-08 |
| SNHG12 | ARL2BP   | -0.22  | 3.89E-08 |
| SNHG12 | TANC1    | -0.22  | 4.21E-08 |
| SNHG12 | IL6ST    | -0.221 | 3.44E-08 |
| SNHG12 | METAP1   | -0.221 | 3.43E-08 |
| SNHG12 | SERBP1   | -0.222 | 2.80E-08 |
| SNHG12 | UBXN2B   | -0.223 | 2.40E-08 |
| SNHG12 | FRS2     | -0.223 | 2.58E-08 |
| SNHG12 | LIN7C    | -0.223 | 2.40E-08 |
| SNHG12 | RBL2     | -0.224 | 2.03E-08 |
| SNHG12 | SCAMP2   | -0.224 | 2.33E-08 |
| SNHG12 | PUM2     | -0.224 | 2.10E-08 |
| SNHG12 | APC      | -0.224 | 2.15E-08 |
| SNHG12 | ADIPOR1  | -0.225 | 1.86E-08 |
| SNHG12 | PPP3CA   | -0.226 | 1.57E-08 |
| SNHG12 | HNRNPR   | -0.226 | 1.69E-08 |
| SNHG12 | CRK      | -0.226 | 1.74E-08 |



|        |          |        |          |
|--------|----------|--------|----------|
| SNHG12 | PRRC2B   | -0.226 | 1.66E-08 |
| SNHG12 | PGAP1    | -0.227 | 1.31E-08 |
| SNHG12 | TMOD3    | -0.227 | 1.37E-08 |
| SNHG12 | DDX3X    | -0.228 | 1.18E-08 |
| SNHG12 | TOGARAM  | -0.228 | 1.14E-08 |
| SNHG12 | MTF1     | -0.228 | 1.28E-08 |
| SNHG12 | SP2      | -0.229 | 1.04E-08 |
| SNHG12 | PGRMC1   | -0.23  | 8.79E-09 |
| SNHG12 | PHF6     | -0.23  | 9.48E-09 |
| SNHG12 | PCNX4    | -0.231 | 7.90E-09 |
| SNHG12 | SLC25A44 | -0.231 | 7.19E-09 |
| SNHG12 | DHTKD1   | -0.231 | 7.90E-09 |
| SNHG12 | SMC2     | -0.232 | 6.65E-09 |
| SNHG12 | ZXDB     | -0.233 | 5.78E-09 |
| SNHG12 | SPOPL    | -0.234 | 5.07E-09 |
| SNHG12 | CDC14A   | -0.235 | 4.15E-09 |
| SNHG12 | UBE3A    | -0.235 | 3.94E-09 |
| SNHG12 | CADM1    | -0.235 | 4.01E-09 |
| SNHG12 | TEAD1    | -0.235 | 4.34E-09 |
| SNHG12 | SLC25A24 | -0.237 | 3.25E-09 |
| SNHG12 | PLPP3    | -0.237 | 2.82E-09 |
| SNHG12 | NACC2    | -0.237 | 2.80E-09 |
| SNHG12 | HIPK1    | -0.237 | 2.92E-09 |
| SNHG12 | PAPOLA   | -0.237 | 3.17E-09 |
| SNHG12 | ZNF268   | -0.238 | 2.47E-09 |
| SNHG12 | CTNND1   | -0.238 | 2.77E-09 |
| SNHG12 | BLOC1S5- | -0.239 | 2.29E-09 |
| SNHG12 | CAMSAP2  | -0.239 | 2.12E-09 |
| SNHG12 | NR2F2    | -0.24  | 1.96E-09 |
| SNHG12 | SBF2     | -0.241 | 1.61E-09 |
| SNHG12 | CAMK2N1  | -0.242 | 1.45E-09 |
| SNHG12 | LONP2    | -0.242 | 1.46E-09 |
| SNHG12 | SESN3    | -0.242 | 1.40E-09 |
| SNHG12 | COL4A3BF | -0.242 | 1.45E-09 |
| SNHG12 | APPBP2   | -0.242 | 1.43E-09 |
| SNHG12 | SLBP     | -0.243 | 1.17E-09 |
| SNHG12 | YME1L1   | -0.243 | 1.19E-09 |
| SNHG12 | NPR3     | -0.243 | 1.24E-09 |
| SNHG12 | IQGAP1   | -0.243 | 1.16E-09 |
| SNHG12 | C5orf24  | -0.243 | 1.22E-09 |
| SNHG12 | TNPO1    | -0.244 | 1.02E-09 |
| SNHG12 | CASC4    | -0.244 | 9.85E-10 |
| SNHG12 | CCNG1    | -0.246 | 7.50E-10 |
| SNHG12 | ERBIN    | -0.247 | 6.27E-10 |
| SNHG12 | PAK2     | -0.247 | 6.49E-10 |
| SNHG12 | NLN      | -0.248 | 5.11E-10 |
| SNHG12 | STEAP2   | -0.249 | 4.70E-10 |
| SNHG12 | PTPRJ    | -0.25  | 3.58E-10 |
| SNHG12 | ZNF620   | -0.25  | 3.78E-10 |
| SNHG12 | SDAD1    | -0.25  | 3.56E-10 |
| SNHG12 | CHURC1   | -0.25  | 3.89E-10 |
| SNHG12 | FNDC3A   | -0.251 | 2.95E-10 |
| SNHG12 | DUSP16   | -0.251 | 3.00E-10 |
| SNHG12 | PUM1     | -0.251 | 3.03E-10 |
| SNHG12 | SSR1     | -0.251 | 3.02E-10 |
| SNHG12 | DNAJC21  | -0.251 | 3.36E-10 |
| SNHG12 | ABI2     | -0.251 | 3.31E-10 |
| SNHG12 | TMBIM4   | -0.252 | 2.59E-10 |

|        |          |        |          |
|--------|----------|--------|----------|
| SNHG12 | BECN1    | -0.252 | 2.85E-10 |
| SNHG12 | GOLIM4   | -0.253 | 2.32E-10 |
| SNHG12 | OCRL     | -0.253 | 2.39E-10 |
| SNHG12 | CERS6    | -0.254 | 1.91E-10 |
| SNHG12 | ARMC1    | -0.254 | 2.03E-10 |
| SNHG12 | TRAPPC10 | -0.255 | 1.56E-10 |
| SNHG12 | MAP1LC3B | -0.256 | 1.41E-10 |
| SNHG12 | AZIN1    | -0.256 | 1.33E-10 |
| SNHG12 | PRTG     | -0.257 | 1.13E-10 |
| SNHG12 | CREB3L2  | -0.257 | 1.23E-10 |
| SNHG12 | ITGA2    | -0.257 | 1.18E-10 |
| SNHG12 | CMTM6    | -0.259 | 7.78E-11 |
| SNHG12 | KAT2B    | -0.26  | 7.23E-11 |
| SNHG12 | GLG1     | -0.26  | 7.32E-11 |
| SNHG12 | MBIP     | -0.26  | 6.64E-11 |
| SNHG12 | HNRNPK   | -0.261 | 5.49E-11 |
| SNHG12 | IBTK     | -0.261 | 6.07E-11 |
| SNHG12 | SATB1    | -0.261 | 5.92E-11 |
| SNHG12 | TOB2     | -0.262 | 4.98E-11 |
| SNHG12 | ZBTB33   | -0.262 | 4.40E-11 |
| SNHG12 | CCDC117  | -0.263 | 3.72E-11 |
| SNHG12 | KPNA6    | -0.264 | 3.42E-11 |
| SNHG12 | LYSMD3   | -0.264 | 3.48E-11 |
| SNHG12 | RALGPS2  | -0.265 | 2.84E-11 |
| SNHG12 | GNAQ     | -0.266 | 2.29E-11 |
| SNHG12 | TMEM167  | -0.267 | 2.04E-11 |
| SNHG12 | KIAA0040 | -0.267 | 2.13E-11 |
| SNHG12 | KIF1B    | -0.267 | 1.85E-11 |
| SNHG12 | ANKFY1   | -0.269 | 1.30E-11 |
| SNHG12 | WWC1     | -0.269 | 1.41E-11 |
| SNHG12 | WDFY3    | -0.269 | 1.46E-11 |
| SNHG12 | ZMAT3    | -0.27  | 1.16E-11 |
| SNHG12 | JKAMP    | -0.27  | 1.08E-11 |
| SNHG12 | MTMR9    | -0.271 | 9.84E-12 |
| SNHG12 | DDX6     | -0.271 | 1.02E-11 |
| SNHG12 | UBR1     | -0.271 | 1.05E-11 |
| SNHG12 | SNAPC5   | -0.272 | 7.77E-12 |
| SNHG12 | RRM2B    | -0.272 | 7.74E-12 |
| SNHG12 | MKLN1    | -0.273 | 6.21E-12 |
| SNHG12 | PAIP1    | -0.275 | 4.46E-12 |
| SNHG12 | CALM2    | -0.275 | 4.27E-12 |
| SNHG12 | ATF1     | -0.276 | 3.63E-12 |
| SNHG12 | VPS50    | -0.276 | 3.58E-12 |
| SNHG12 | EIF3A    | -0.277 | 3.09E-12 |
| SNHG12 | ZNF618   | -0.277 | 3.12E-12 |
| SNHG12 | RYBP     | -0.279 | 2.29E-12 |
| SNHG12 | RAB6A    | -0.279 | 2.30E-12 |
| SNHG12 | METTL9   | -0.279 | 2.08E-12 |
| SNHG12 | LYRM7    | -0.28  | 1.94E-12 |
| SNHG12 | PRKDC    | -0.28  | 1.98E-12 |
| SNHG12 | ZNF106   | -0.282 | 1.27E-12 |
| SNHG12 | CLOCK    | -0.284 | 8.04E-13 |
| SNHG12 | ACVR2A   | -0.284 | 8.31E-13 |
| SNHG12 | LRP12    | -0.285 | 6.54E-13 |
| SNHG12 | VPS26A   | -0.286 | 5.86E-13 |
| SNHG12 | RHOBTB3  | -0.286 | 6.21E-13 |
| SNHG12 | KRAS     | -0.287 | 4.80E-13 |
| SNHG12 | SPPL2A   | -0.287 | 4.37E-13 |

|        |          |        |          |
|--------|----------|--------|----------|
| SNHG12 | ATRX     | -0.287 | 4.44E-13 |
| SNHG12 | RBMXL1   | -0.288 | 3.74E-13 |
| SNHG12 | CTNNB1   | -0.288 | 3.78E-13 |
| SNHG12 | MAPK1    | -0.288 | 3.87E-13 |
| SNHG12 | SLC5A3   | -0.289 | 3.02E-13 |
| SNHG12 | DYM      | -0.29  | 2.64E-13 |
| SNHG12 | PDPK1    | -0.29  | 2.74E-13 |
| SNHG12 | PURA     | -0.29  | 2.75E-13 |
| SNHG12 | FAM120A  | -0.29  | 2.83E-13 |
| SNHG12 | VPS36    | -0.291 | 2.16E-13 |
| SNHG12 | RAB21    | -0.291 | 2.31E-13 |
| SNHG12 | SERP1    | -0.291 | 2.15E-13 |
| SNHG12 | SHOC2    | -0.292 | 1.70E-13 |
| SNHG12 | PDLIM5   | -0.292 | 1.75E-13 |
| SNHG12 | CGGBP1   | -0.292 | 1.69E-13 |
| SNHG12 | IPO7     | -0.293 | 1.37E-13 |
| SNHG12 | ETF1     | -0.293 | 1.38E-13 |
| SNHG12 | CDYL     | -0.293 | 1.43E-13 |
| SNHG12 | YAP1     | -0.293 | 1.49E-13 |
| SNHG12 | GPD2     | -0.294 | 1.16E-13 |
| SNHG12 | HUWE1    | -0.295 | 9.07E-14 |
| SNHG12 | MTUS1    | -0.295 | 9.13E-14 |
| SNHG12 | PLAG1    | -0.296 | 7.78E-14 |
| SNHG12 | ARMT1    | -0.297 | 7.20E-14 |
| SNHG12 | XIAP     | -0.298 | 5.51E-14 |
| SNHG12 | LMBRD2   | -0.298 | 4.97E-14 |
| SNHG12 | DENND1B  | -0.298 | 5.34E-14 |
| SNHG12 | TMEM50B  | -0.298 | 5.10E-14 |
| SNHG12 | TACC1    | -0.298 | 5.81E-14 |
| SNHG12 | SMC1A    | -0.299 | 4.75E-14 |
| SNHG12 | DAAM1    | -0.3   | 3.39E-14 |
| SNHG12 | CISD1    | -0.3   | 3.24E-14 |
| SNHG12 | PRKCI    | -0.3   | 3.53E-14 |
| SNHG12 | GTF2A1   | -0.3   | 3.39E-14 |
| SNHG12 | CDC42    | -0.301 | 2.66E-14 |
| SNHG12 | MED13    | -0.302 | 2.53E-14 |
| SNHG12 | ZDHHC23  | -0.303 | 1.80E-14 |
| SNHG12 | ZFP91    | -0.303 | 1.93E-14 |
| SNHG12 | VEZF1    | -0.303 | 1.77E-14 |
| SNHG12 | ABHD17B  | -0.304 | 1.44E-14 |
| SNHG12 | ARF4     | -0.305 | 1.22E-14 |
| SNHG12 | CNIH1    | -0.306 | 9.85E-15 |
| SNHG12 | WWC2     | -0.307 | 7.98E-15 |
| SNHG12 | ZBTB10   | -0.307 | 8.74E-15 |
| SNHG12 | XPO7     | -0.307 | 9.20E-15 |
| SNHG12 | PCNX1    | -0.308 | 6.38E-15 |
| SNHG12 | EXOC5    | -0.308 | 6.83E-15 |
| SNHG12 | CNN3     | -0.309 | 6.09E-15 |
| SNHG12 | CSDE1    | -0.31  | 4.81E-15 |
| SNHG12 | POLR2M   | -0.31  | 4.13E-15 |
| SNHG12 | HSPH1    | -0.31  | 4.87E-15 |
| SNHG12 | SYAP1    | -0.311 | 3.99E-15 |
| SNHG12 | ABRAXAS2 | -0.311 | 3.35E-15 |
| SNHG12 | USP10    | -0.312 | 2.73E-15 |
| SNHG12 | GSK3B    | -0.313 | 2.20E-15 |
| SNHG12 | MAL2     | -0.313 | 2.13E-15 |
| SNHG12 | FBXL4    | -0.314 | 1.81E-15 |
| SNHG12 | CTCF     | -0.314 | 1.91E-15 |

|        |           |        |          |
|--------|-----------|--------|----------|
| SNHG12 | VGLL4     | -0.316 | 1.21E-15 |
| SNHG12 | ADRB1     | -0.316 | 1.30E-15 |
| SNHG12 | ASXL2     | -0.317 | 1.02E-15 |
| SNHG12 | PIK3C2A   | -0.318 | 8.67E-16 |
| SNHG12 | MYO1D     | -0.319 | 6.38E-16 |
| SNHG12 | UEVLD     | -0.32  | 5.41E-16 |
| SNHG12 | NUS1      | -0.32  | 4.68E-16 |
| SNHG12 | IMPAD1    | -0.32  | 4.68E-16 |
| SNHG12 | KIDINS220 | -0.321 | 3.88E-16 |
| SNHG12 | WDR7      | -0.323 | 2.39E-16 |
| SNHG12 | IPPK      | -0.323 | 2.77E-16 |
| SNHG12 | CRIM1     | -0.324 | 2.08E-16 |
| SNHG12 | RAB3IP    | -0.324 | 1.99E-16 |
| SNHG12 | MAN1A2    | -0.325 | 1.71E-16 |
| SNHG12 | ZBTB4     | -0.325 | 1.70E-16 |
| SNHG12 | PTP4A1    | -0.325 | 1.65E-16 |
| SNHG12 | GAS1      | -0.326 | 1.21E-16 |
| SNHG12 | RAB11FIP2 | -0.326 | 1.49E-16 |
| SNHG12 | SPTSSA    | -0.327 | 1.11E-16 |
| SNHG12 | CALM1     | -0.327 | 1.10E-16 |
| SNHG12 | ADD3      | -0.327 | 1.01E-16 |
| SNHG12 | CD46      | -0.328 | 8.73E-17 |
| SNHG12 | PTPMT1    | -0.328 | 8.91E-17 |
| SNHG12 | TSNAX     | -0.328 | 8.88E-17 |
| SNHG12 | VTI1A     | -0.328 | 8.45E-17 |
| SNHG12 | RNF13     | -0.329 | 6.68E-17 |
| SNHG12 | GLCE      | -0.331 | 4.09E-17 |
| SNHG12 | NIPSNAP2  | -0.331 | 4.68E-17 |
| SNHG12 | VCP       | -0.331 | 4.43E-17 |
| SNHG12 | RBM12     | -0.331 | 4.85E-17 |
| SNHG12 | PLS1      | -0.333 | 2.73E-17 |
| SNHG12 | PARVA     | -0.333 | 2.70E-17 |
| SNHG12 | LRRC58    | -0.334 | 2.41E-17 |
| SNHG12 | ABHD13    | -0.334 | 2.01E-17 |
| SNHG12 | BMPR2     | -0.334 | 2.23E-17 |
| SNHG12 | PTCH1     | -0.334 | 2.10E-17 |
| SNHG12 | ATP7A     | -0.335 | 1.69E-17 |
| SNHG12 | PTPN11    | -0.335 | 1.66E-17 |
| SNHG12 | SINHCAF   | -0.337 | 1.14E-17 |
| SNHG12 | BCL7A     | -0.337 | 1.09E-17 |
| SNHG12 | MAPRE1    | -0.338 | 9.37E-18 |
| SNHG12 | TMEM19    | -0.339 | 7.45E-18 |
| SNHG12 | ITGA6     | -0.34  | 5.22E-18 |
| SNHG12 | THUMPD3   | -0.34  | 4.93E-18 |
| SNHG12 | RLIM      | -0.34  | 5.87E-18 |
| SNHG12 | ERC1      | -0.341 | 4.14E-18 |
| SNHG12 | ZHX3      | -0.342 | 3.57E-18 |
| SNHG12 | FAM210B   | -0.342 | 3.25E-18 |
| SNHG12 | RPRD1A    | -0.342 | 3.07E-18 |
| SNHG12 | H2AFV     | -0.342 | 3.18E-18 |
| SNHG12 | PPP2CB    | -0.343 | 2.57E-18 |
| SNHG12 | NDUFA10   | -0.343 | 2.70E-18 |
| SNHG12 | IER3IP1   | -0.344 | 2.20E-18 |
| SNHG12 | ZNF770    | -0.344 | 2.13E-18 |
| SNHG12 | FBXO33    | -0.344 | 2.12E-18 |
| SNHG12 | USP9X     | -0.345 | 1.43E-18 |
| SNHG12 | BCL9      | -0.345 | 1.81E-18 |
| SNHG12 | CDC37L1   | -0.345 | 1.67E-18 |

|        |          |        |          |
|--------|----------|--------|----------|
| SNHG12 | RAB7A    | -0.345 | 1.48E-18 |
| SNHG12 | CUL5     | -0.346 | 1.31E-18 |
| SNHG12 | PPP2CA   | -0.347 | 9.44E-19 |
| SNHG12 | NR1D2    | -0.348 | 7.66E-19 |
| SNHG12 | TOB1     | -0.349 | 5.85E-19 |
| SNHG12 | CLINT1   | -0.35  | 4.85E-19 |
| SNHG12 | RHOA     | -0.35  | 4.45E-19 |
| SNHG12 | ZDHHC5   | -0.35  | 4.91E-19 |
| SNHG12 | LONRF2   | -0.35  | 4.87E-19 |
| SNHG12 | TRAPPC8  | -0.351 | 3.87E-19 |
| SNHG12 | RAB10    | -0.351 | 3.49E-19 |
| SNHG12 | UBE2K    | -0.352 | 2.98E-19 |
| SNHG12 | C11orf54 | -0.354 | 1.98E-19 |
| SNHG12 | BTBD1    | -0.354 | 1.97E-19 |
| SNHG12 | MINDY2   | -0.355 | 1.24E-19 |
| SNHG12 | UBR3     | -0.355 | 1.29E-19 |
| SNHG12 | HOXB9    | -0.355 | 1.26E-19 |
| SNHG12 | RUNDC1   | -0.357 | 7.95E-20 |
| SNHG12 | CPT1A    | -0.358 | 6.57E-20 |
| SNHG12 | LIFR     | -0.359 | 4.49E-20 |
| SNHG12 | RNF38    | -0.361 | 2.99E-20 |
| SNHG12 | KIF5B    | -0.362 | 2.25E-20 |
| SNHG12 | ZFR      | -0.363 | 1.62E-20 |
| SNHG12 | TMEM38B  | -0.363 | 1.84E-20 |
| SNHG12 | CD2AP    | -0.363 | 1.95E-20 |
| SNHG12 | CSTF2T   | -0.364 | 1.25E-20 |
| SNHG12 | C5orf22  | -0.364 | 1.30E-20 |
| SNHG12 | ZNRF2    | -0.365 | 1.19E-20 |
| SNHG12 | C6orf120 | -0.365 | 1.21E-20 |
| SNHG12 | PTPN13   | -0.365 | 9.66E-21 |
| SNHG12 | IRF2BPL  | -0.366 | 8.71E-21 |
| SNHG12 | ARFGEF2  | -0.366 | 7.35E-21 |
| SNHG12 | NFE2L2   | -0.367 | 6.51E-21 |
| SNHG12 | CAPZA2   | -0.367 | 6.80E-21 |
| SNHG12 | EID1     | -0.367 | 5.87E-21 |
| SNHG12 | MAPKAP1  | -0.368 | 5.04E-21 |
| SNHG12 | WNK1     | -0.368 | 5.25E-21 |
| SNHG12 | NTN4     | -0.368 | 5.17E-21 |
| SNHG12 | DNAJA2   | -0.369 | 4.21E-21 |
| SNHG12 | DNAJC6   | -0.37  | 2.73E-21 |
| SNHG12 | MARVELD1 | -0.37  | 3.26E-21 |
| SNHG12 | SOS2     | -0.373 | 1.47E-21 |
| SNHG12 | LYPLA1   | -0.375 | 7.22E-22 |
| SNHG12 | FBXW11   | -0.375 | 7.26E-22 |
| SNHG12 | ZNRF3    | -0.379 | 2.86E-22 |
| SNHG12 | ARL5A    | -0.38  | 1.86E-22 |
| SNHG12 | MIB1     | -0.383 | 1.01E-22 |
| SNHG12 | THAP10   | -0.383 | 8.65E-23 |
| SNHG12 | MRPL44   | -0.384 | 6.71E-23 |
| SNHG12 | RAB5A    | -0.384 | 7.53E-23 |
| SNHG12 | OSBPL8   | -0.385 | 5.65E-23 |
| SNHG12 | CHMP2B   | -0.385 | 4.97E-23 |
| SNHG12 | PRKAA2   | -0.385 | 5.67E-23 |
| SNHG12 | CHM      | -0.388 | 2.36E-23 |
| SNHG12 | GSKIP    | -0.39  | 1.18E-23 |
| SNHG12 | STAM2    | -0.391 | 9.27E-24 |
| SNHG12 | STAU2    | -0.392 | 7.00E-24 |
| SNHG12 | WDR48    | -0.393 | 5.44E-24 |

|        |           |        |          |
|--------|-----------|--------|----------|
| SNHG12 | CYP2U1    | -0.394 | 3.62E-24 |
| SNHG12 | SLAIN2    | -0.394 | 3.86E-24 |
| SNHG12 | CPEB3     | -0.394 | 3.55E-24 |
| SNHG12 | HOXA7     | -0.395 | 3.45E-24 |
| SNHG12 | PTPN4     | -0.395 | 2.83E-24 |
| SNHG12 | TRIP11    | -0.396 | 2.04E-24 |
| SNHG12 | LAPTM4B   | -0.397 | 1.94E-24 |
| SNHG12 | RRAGD     | -0.397 | 1.87E-24 |
| SNHG12 | PAPPA     | -0.397 | 1.52E-24 |
| SNHG12 | RAD23B    | -0.397 | 1.67E-24 |
| SNHG12 | SEMA6D    | -0.397 | 1.46E-24 |
| SNHG12 | SOWAHC    | -0.399 | 1.01E-24 |
| SNHG12 | PTBP3     | -0.4   | 6.99E-25 |
| SNHG12 | DDX1      | -0.401 | 4.93E-25 |
| SNHG12 | LMBR1     | -0.402 | 4.50E-25 |
| SNHG12 | USF3      | -0.402 | 4.37E-25 |
| SNHG12 | ATP1B1    | -0.404 | 2.38E-25 |
| SNHG12 | NCOA1     | -0.409 | 5.20E-26 |
| SNHG12 | LRP10     | -0.409 | 4.67E-26 |
| SNHG12 | TM9SF3    | -0.41  | 3.94E-26 |
| SNHG12 | ACSL1     | -0.41  | 3.11E-26 |
| SNHG12 | OGFOD1    | -0.411 | 2.28E-26 |
| SNHG12 | ZMYND11   | -0.411 | 2.37E-26 |
| SNHG12 | SNX4      | -0.411 | 2.98E-26 |
| SNHG12 | LANCL1    | -0.411 | 3.04E-26 |
| SNHG12 | ACBD5     | -0.414 | 1.07E-26 |
| SNHG12 | NCOA7     | -0.414 | 1.12E-26 |
| SNHG12 | RANBP2    | -0.414 | 1.00E-26 |
| SNHG12 | UHMK1     | -0.415 | 7.49E-27 |
| SNHG12 | TBC1D9    | -0.417 | 4.63E-27 |
| SNHG12 | RMND5A    | -0.42  | 1.52E-27 |
| SNHG12 | GPHN      | -0.42  | 1.49E-27 |
| SNHG12 | ATAD1     | -0.422 | 8.47E-28 |
| SNHG12 | CD164     | -0.427 | 1.58E-28 |
| SNHG12 | CPEB4     | -0.428 | 1.42E-28 |
| SNHG12 | GLYR1     | -0.428 | 1.27E-28 |
| SNHG12 | FBXO21    | -0.429 | 8.89E-29 |
| SNHG12 | FAM171A1  | -0.43  | 6.15E-29 |
| SNHG12 | GDE1      | -0.43  | 6.10E-29 |
| SNHG12 | UTP14C    | -0.433 | 2.55E-29 |
| SNHG12 | NCOA4     | -0.434 | 1.88E-29 |
| SNHG12 | SEPHS1    | -0.435 | 1.19E-29 |
| SNHG12 | CLCN5     | -0.436 | 1.10E-29 |
| SNHG12 | SECISBP2L | -0.436 | 8.84E-30 |
| SNHG12 | KLHL15    | -0.437 | 8.01E-30 |
| SNHG12 | ACSL4     | -0.438 | 5.35E-30 |
| SNHG12 | ASB8      | -0.438 | 5.29E-30 |
| SNHG12 | SACM1L    | -0.438 | 4.50E-30 |
| SNHG12 | MRFAP1    | -0.439 | 3.62E-30 |
| SNHG12 | SNX18     | -0.44  | 2.57E-30 |
| SNHG12 | ARHGAP5   | -0.44  | 2.56E-30 |
| SNHG12 | SLC25A25  | -0.441 | 1.81E-30 |
| SNHG12 | KIAA0232  | -0.444 | 7.35E-31 |
| SNHG12 | CCDC186   | -0.445 | 4.47E-31 |
| SNHG12 | AUH       | -0.447 | 2.41E-31 |
| SNHG12 | MECOM     | -0.448 | 1.84E-31 |
| SNHG12 | DYNLT3    | -0.448 | 1.80E-31 |
| SNHG12 | NT5DC1    | -0.449 | 1.36E-31 |

|        |          |        |          |
|--------|----------|--------|----------|
| SNHG12 | RAB14    | -0.449 | 1.25E-31 |
| SNHG12 | ERLIN2   | -0.449 | 1.43E-31 |
| SNHG12 | CROT     | -0.45  | 8.36E-32 |
| SNHG12 | ZHX1     | -0.451 | 6.85E-32 |
| SNHG12 | ANKRD46  | -0.452 | 4.58E-32 |
| SNHG12 | AKIRIN1  | -0.452 | 4.44E-32 |
| SNHG12 | BBX      | -0.453 | 2.75E-32 |
| SNHG12 | SLC44A1  | -0.454 | 1.99E-32 |
| SNHG12 | FAM169A  | -0.454 | 1.85E-32 |
| SNHG12 | YPEL5    | -0.455 | 1.41E-32 |
| SNHG12 | NAA50    | -0.456 | 9.24E-33 |
| SNHG12 | ABHD2    | -0.457 | 7.52E-33 |
| SNHG12 | USP38    | -0.459 | 3.71E-33 |
| SNHG12 | PBX1     | -0.461 | 1.82E-33 |
| SNHG12 | PRKAR2A  | -0.462 | 1.33E-33 |
| SNHG12 | RTN4     | -0.462 | 1.27E-33 |
| SNHG12 | ALDH5A1  | -0.463 | 9.07E-34 |
| SNHG12 | NIPAL1   | -0.465 | 4.74E-34 |
| SNHG12 | SLC48A1  | -0.465 | 3.99E-34 |
| SNHG12 | MFAP3L   | -0.466 | 3.35E-34 |
| SNHG12 | RBBP5    | -0.474 | 1.30E-35 |
| SNHG12 | WASL     | -0.478 | 2.97E-36 |
| SNHG12 | IVD      | -0.479 | 2.11E-36 |
| SNHG12 | PRMT6    | -0.486 | 1.41E-37 |
| SNHG12 | HACD2    | -0.486 | 1.34E-37 |
| SNHG12 | CAB39    | -0.486 | 1.54E-37 |
| SNHG12 | KLHL8    | -0.488 | 6.27E-38 |
| SNHG12 | TMBIM6   | -0.489 | 4.72E-38 |
| SNHG12 | SLC31A1  | -0.492 | 1.61E-38 |
| SNHG12 | ICMT     | -0.492 | 1.37E-38 |
| SNHG12 | TMEM9B   | -0.494 | 6.91E-39 |
| SNHG12 | TMEM184  | -0.495 | 3.63E-39 |
| SNHG12 | SCP2     | -0.495 | 5.00E-39 |
| SNHG12 | VTI1B    | -0.5   | 5.09E-40 |
| SNHG12 | ALDH9A1  | -0.504 | 1.30E-40 |
| SNHG12 | ABHD17C  | -0.505 | 8.35E-41 |
| SNHG12 | AK3      | -0.505 | 6.16E-41 |
| SNHG12 | SEC62    | -0.506 | 4.58E-41 |
| SNHG12 | RDH11    | -0.507 | 2.82E-41 |
| SNHG12 | CLTC     | -0.51  | 9.13E-42 |
| SNHG12 | YWHAB    | -0.515 | 1.11E-42 |
| SNHG12 | CTDSPL   | -0.516 | 8.55E-43 |
| SNHG12 | ISOC1    | -0.516 | 7.87E-43 |
| SNHG12 | HSD17B12 | -0.524 | 1.99E-44 |
| SNHG12 | HSDL2    | -0.525 | 1.28E-44 |
| SNHG12 | RNF11    | -0.529 | 2.74E-45 |
| SNHG12 | GLRX5    | -0.529 | 1.92E-45 |
| SNHG12 | SC5D     | -0.529 | 2.77E-45 |
| SNHG12 | DLAT     | -0.534 | 2.59E-46 |
| SNHG12 | ACSL3    | -0.535 | 1.92E-46 |
| SNHG12 | CDS1     | -0.538 | 3.47E-47 |
| SNHG12 | DBT      | -0.54  | 1.86E-47 |
| SNHG12 | MPP5     | -0.541 | 1.08E-47 |
| SNHG12 | NR3C2    | -0.547 | 4.49E-49 |
| SNHG12 | PCYOX1   | -0.548 | 3.62E-49 |
| SNHG12 | NNT      | -0.558 | 2.68E-51 |
| SNHG12 | MUT      | -0.562 | 3.44E-52 |
| SNHG12 | DLD      | -0.586 | 1.34E-57 |

|        |         |        |          |
|--------|---------|--------|----------|
| SNHG12 | ATP6V1A | -0.595 | 1.03E-59 |
| SNHG12 | HACD3   | -0.614 | 1.41E-64 |
