# Supplementary material for: Long Non-coding RNA SNHG12 Functions as a Competing Endogenous RNA to Regulate MDM4 Expression by Sponging miR-129-5p in Clear Cell Renal Cell Carcinoma
Source: PubMed Central journal article supplement (PMC6882951; doi:10.3389/fonc.2019.01260), 2019-11-22
Supplement: Image_1.pdf [file Image_1.pdf]

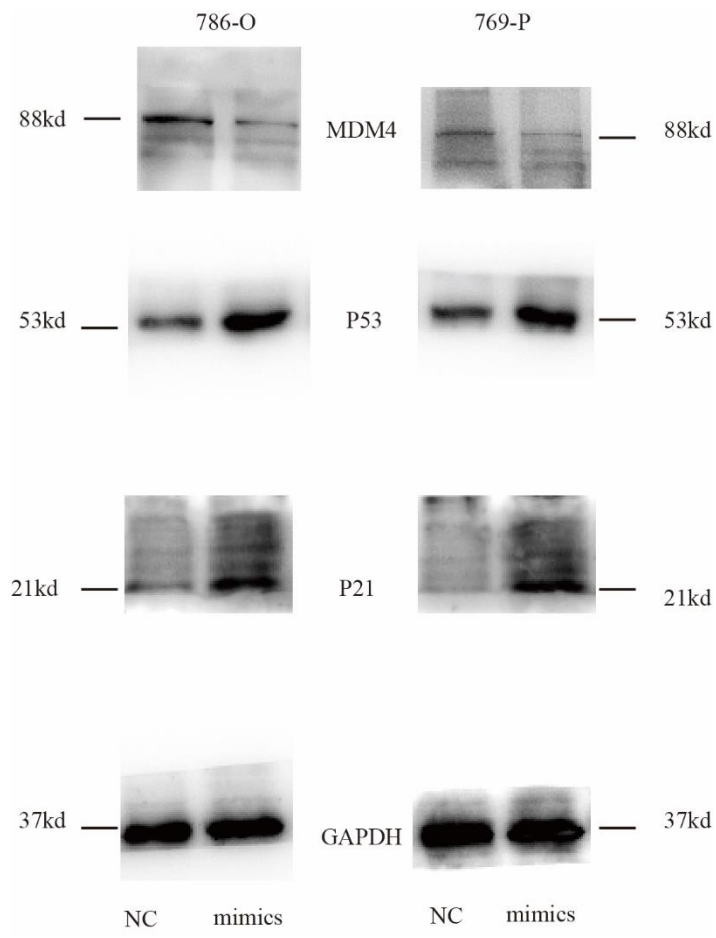

**Figure S1** Original image files for the blots in Figure 6F.

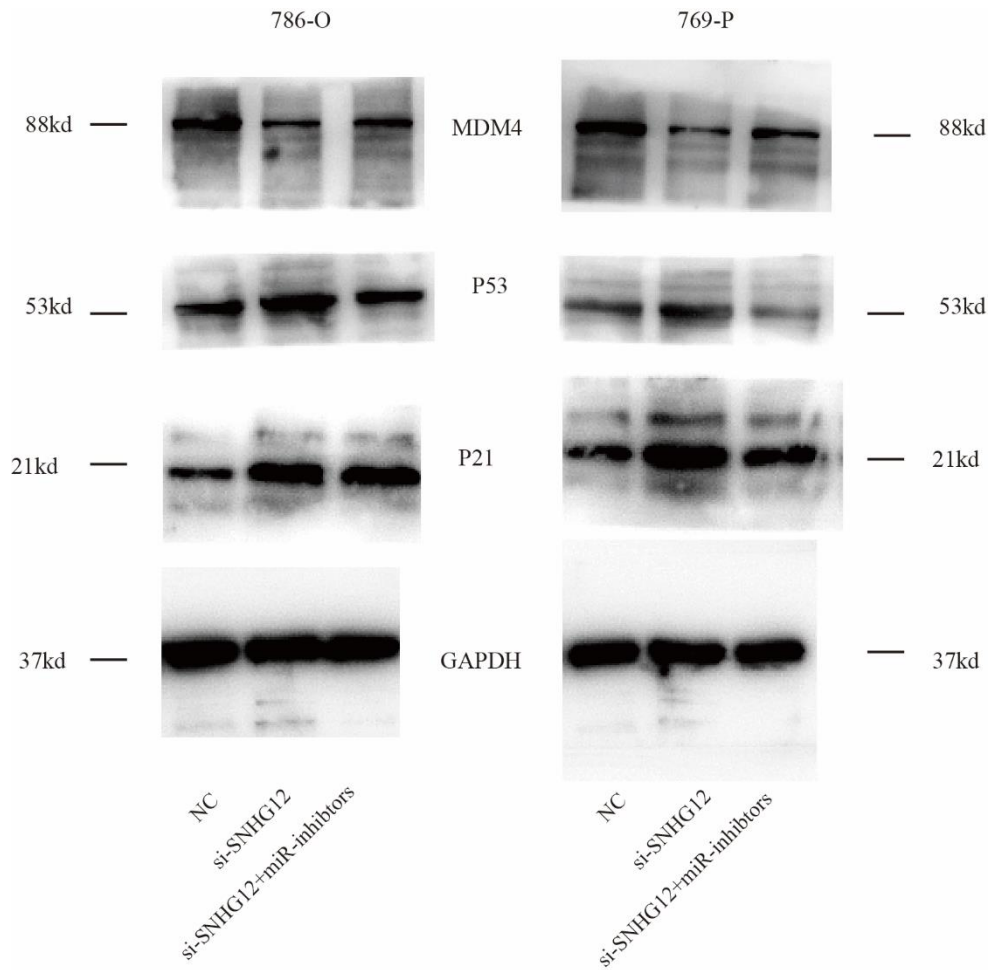

**Figure S2** Original image files for the blots in Figure 6H.
